# Supplementary material
Source: Research Square preprint supplement (doi:10.21203/rs.3.rs-9596285/v1)
Supplement: Supplementary file 1 [file 817e905f98532137b37d1bf6.xlsx]

## Sheet: Hoja1
Virus / sequence name	ICTV-accepted virus species	ICTV-accepted genus / proposed genus	Data source	Host	NCBI GenBank accession (nt)	NCBI GenBank accession (aa)
Agaricus bisporus mitovirus 1	Unuamitovirus agbi1	Unuamitovirus	ICTV Mitoviridae SG (2021)	Agaricus bisporus	KY357500	AQM32767
Alternaria arborescens mitovirus 1	Unuamitovirus alar1	Unuamitovirus	ICTV Mitoviridae SG (2021)	Alternaria arborescens	LC145036	BAV53122
Alternaria brassicicola mitovirus	Unuamitovirus albr1	Unuamitovirus	ICTV Mitoviridae SG (2021)	Alternaria brassicicola	KP705075	AKN79252
Botrytis cinerea mitovirus 4	Unuamitovirus boci4	Unuamitovirus	ICTV Mitoviridae SG (2021)	Botrytis cinerea	LN827947	CEZ26303
Botrytis cinerea mitovirus 2	Unuamitovirus boci2	Unuamitovirus	ICTV Mitoviridae SG (2021)	Botrytis cinerea	LN827941	CEZ26297
Cronartium ribicola mitovirus 5	Unuamitovirus crri5	Unuamitovirus	ICTV Mitoviridae SG (2021)	Cronartium ribicola	KT921183	AMQ67418
Cronartium ribicola mitovirus 4	Unuamitovirus crri4	Unuamitovirus	ICTV Mitoviridae SG (2021)	Cronartium ribicola	KT921182	AMQ67417
Cronartium ribicola mitovirus 3	Unuamitovirus crri3	Unuamitovirus	ICTV Mitoviridae SG (2021)	Cronartium ribicola	KT921181	AMQ67416
Cronartium ribicola mitovirus 2	Unuamitovirus crri2	Unuamitovirus	ICTV Mitoviridae SG (2021)	Cronartium ribicola	KT921180	AMQ67415
Cronartium ribicola mitovirus 1	Unuamitovirus crri1	Unuamitovirus	ICTV Mitoviridae SG (2021)	Cronartium ribicola	KT921179	AMQ67414
Diaporthe rudis mitovirus 1	Unuamitovirus diru1	Unuamitovirus	ICTV Mitoviridae SG (2021)	Diaporthe rudis	MT216310	QNS28825
Entomophthora muscae mitovirus 7	Unuamitovirus enmu7	Unuamitovirus	ICTV Mitoviridae SG (2021)	Entomophthora muscae	MK682519	QCF24451
Entomophthora muscae mitovirus 2	Unuamitovirus enmu2	Unuamitovirus	ICTV Mitoviridae SG (2021)	Entomophthora muscae	MK682514	QCF24446
Entomophthora muscae mitovirus 1	Unuamitovirus enmu1	Unuamitovirus	ICTV Mitoviridae SG (2021)	Entomophthora muscae	MK682513	QCF24445
Entomophthora muscae mitovirus 3	Unuamitovirus enmu3	Unuamitovirus	ICTV Mitoviridae SG (2021)	Entomophthora muscae	MK682515	QCF24447
Entomophthora muscae mitovirus 4	Unuamitovirus enmu4	Unuamitovirus	ICTV Mitoviridae SG (2021)	Entomophthora muscae	MK682516	QCF24448
Entomophthora muscae mitovirus 5	Unuamitovirus enmu5	Unuamitovirus	ICTV Mitoviridae SG (2021)	Entomophthora muscae	MK682517	QCF24449
Entomophthora muscae mitovirus 6	Unuamitovirus enmu6	Unuamitovirus	ICTV Mitoviridae SG (2021)	Entomophthora muscae	MK682518	QCF24450
Entomophthora muscae mitovirus 8	Unuamitovirus enmu8	Unuamitovirus	ICTV Mitoviridae SG (2021)	Entomophthora muscae	BK010736	DAC76947
Fusarium andiyazi mitovirus 1	Unuamitovirus fuan1	Unuamitovirus	ICTV Mitoviridae SG (2021)	Fusarium andiyazi	MT506025	QPK91779
Fusarium circinatum mitovirus 1	Unuamitovirus fuci1	Unuamitovirus	ICTV Mitoviridae SG (2021)	Fusarium circinatum	KF803546	AHI43533
Fusarium circinatum mitovirus 2-1	Unuamitovirus fuci2	Unuamitovirus	ICTV Mitoviridae SG (2021)	Fusarium circinatum	KF803547	AHI43534
Fusarium coeruleum mitovirus 1	Unuamitovirus fuco1	Unuamitovirus	ICTV Mitoviridae SG (2021)	Fusarium coeruleum	LC006129	BAQ36630
Fusarium globosum mitovirus 1	Unuamitovirus fugl1	Unuamitovirus	ICTV Mitoviridae SG (2021)	Fusarium globosum	LC006128	BAQ36629
Fusarium oxysporum f. sp. dianthi mitovirus 1	Unuamitovirus fuox1	Unuamitovirus	ICTV Mitoviridae SG (2021)	Fusarium oxysporum	MN586595	QIC51112
Fusarium poae mitovirus 1	Unuamitovirus fupo1	Unuamitovirus	ICTV Mitoviridae SG (2021)	Fusarium poae	LC150564	BAV56289
Fusarium poae mitovirus 2	Unuamitovirus fupo2	Unuamitovirus	ICTV Mitoviridae SG (2021)	Fusarium poae	LC150565	BAV56290
Fusarium verticillioides mitovirus 1	Unuamitovirus fuve1	Unuamitovirus	ICTV Mitoviridae SG (2021)	Fusarium verticillioides	MT506024	QPK91778
Gremmeniella mitovirus S1	Unuamitovirus grab1	Unuamitovirus	ICTV Mitoviridae SG (2021)	Gremmeniella abietina	AF534641	AAN05635
Gremmeniella abietina non-host-specific mitochondrial RNA virus S1	Unuamitovirus grab2	Unuamitovirus	ICTV Mitoviridae SG (2021)	Gremmeniella abietina	JN654496	AEY76153
Helicobasidium mompa mitovirus 1-18	Unuamitovirus hemo1	Unuamitovirus	ICTV Mitoviridae SG (2021)	Helicobasidium mompa	AB110977	BAD72871
Heterobasidion mitovirus 2	Unuamitovirus hean2	Unuamitovirus	ICTV Mitoviridae SG (2021)	Heterobasidion annosum	MN058206	QED55404
Hymenoscyphus fraxineus [albidus] mitovirus 1	Unuamitovirus hyal1	Unuamitovirus	ICTV Mitoviridae SG (2021)	Hymenoscyphus albidus	MK079847	AZG04290
Hymenoscyphus fraxineus mitovirus 1	Unuamitovirus hyfr1	Unuamitovirus	ICTV Mitoviridae SG (2021)	Hymenoscyphus fraxineus	KJ667051	AIU44705
Leptosphaeria biglobosa mitovirus 1	Unuamitovirus lebi1	Unuamitovirus	ICTV Mitoviridae SG (2021)	Leptosphaeria biglobosa	MG659316	AVZ65960
Nigrospora oryzae mitovirus 2	Unuamitovirus nior2	Unuamitovirus	ICTV Mitoviridae SG (2021)	Nigrospora oryzae	MH823902	AZP53929
Ophiostoma mitovirus 4	Unuamitovirus opno4	Unuamitovirus	ICTV Mitoviridae SG (2021)	Ophiostoma novo-ulmi	AJ132754	CAB42652.1
Ophiostoma mitovirus 5	Unuamitovirus opno5	Unuamitovirus	ICTV Mitoviridae SG (2021)	Ophiostoma novo-ulmi	AJ132755	CAB42653.1
Ophiostoma mitovirus 6	Unuamitovirus opno6	Unuamitovirus	ICTV Mitoviridae SG (2021)	Ophiostoma novo-ulmi	AJ132756	CAB42654.1
Puccinia striiformis mitovirus 1	Unuamitovirus pust1	Unuamitovirus	ICTV Mitoviridae SG (2021)	Puccinia striiformis	MK033478	AZY91986
Sclerotinia nivalis mitovirus 1	Unuamitovirus scni1	Unuamitovirus	ICTV Mitoviridae SG (2021)	Sclerotinia nivalis	KT365895	ANJ77669
Sclerotinia sclerotiorum mitovirus 1	Unuamitovirus scsc1	Unuamitovirus	ICTV Mitoviridae SG (2021)	Sclerotinia sclerotiorum	JQ013377	AEX91878
Sclerotinia sclerotiorum mitovirus 2	Unuamitovirus scsc2	Unuamitovirus	ICTV Mitoviridae SG (2021)	Sclerotinia sclerotiorum	JQ013378	AEX91879
Sclerotinia sclerotiorum mitovirus 4	Unuamitovirus scsc4	Unuamitovirus	ICTV Mitoviridae SG (2021)	Sclerotinia sclerotiorum	JX401538	AGC24233
Sclerotinia sclerotiorum mitovirus 7	Unuamitovirus scsc7	Unuamitovirus	ICTV Mitoviridae SG (2021)	Sclerotinia sclerotiorum	KJ462514	AHX84135
Thielaviopsis basicola mitovirus	Unuamitovirus thba1	Unuamitovirus	ICTV Mitoviridae SG (2021)	Thielaviopsis basicola	AY563138	AAT09164
Neofusicoccum parvum mitovirus 1	Duamitovirus nepa1	Duamitovirus	ICTV Mitoviridae SG (2021)	Neofusicoccum parvum	MK584831	QDB74992
Rhizoctonia solani mitovirus 34	Duamitovirus rhso34	Duamitovirus	ICTV Mitoviridae SG (2021)	Rhizoctonia solani	MK372903	QDW65424
Botryosphaeria dothidea mitovirus 1	Duamitovirus bodo1	Duamitovirus	ICTV Mitoviridae SG (2021)	Botryosphaeria dothidea	MT676452	QMU24933
Buergenerula spartinae mitovirus 1	Duamitovirus busp1	Duamitovirus	ICTV Mitoviridae SG (2021)	Buergenerula spartinae	KJ485703	AHY03257
Rhizoctonia solani mitovirus 26	Duamitovirus rhso26	Duamitovirus	ICTV Mitoviridae SG (2021)	Rhizoctonia solani	MK372895	QDW65416
Rhizoctonia solani mitovirus 27	Duamitovirus rhso27	Duamitovirus	ICTV Mitoviridae SG (2021)	Rhizoctonia solani	MK372896	QDW65417
Rhizoctonia cerealis mitovirus	Duamitovirus rhce1	Duamitovirus	ICTV Mitoviridae SG (2021)	Rhizoctonia cerealis	KM517201	AIT71973
Alternaria alternata mitovirus 1	Duamitovirus alal1	Duamitovirus	ICTV Mitoviridae SG (2021)	Alternaria alternata	MK584829	QDB74990
Azolla filiculoides mitovirus 1	Duamitovirus azfi1	Duamitovirus	ICTV Mitoviridae SG (2021)	Azolla filiculoides	BK010423	DAB41741
Beta vulgaris mitovirus 1	Duamitovirus bevu1	Duamitovirus	ICTV Mitoviridae SG (2021)	Beta vulgaris	MG721540	AVH76945
Botrytis cinerea mitovirus 1	Duamitovirus boci1	Duamitovirus	ICTV Mitoviridae SG (2021)	Botrytis cinerea	EF580100	ABQ65153
Botrytis cinerea mitovirus 3	Duamitovirus boci3	Duamitovirus	ICTV Mitoviridae SG (2021)	Botrytis cinerea	LN827942	CEZ26298
Cannabis sativa mitovirus 1	Duamitovirus casa1	Duamitovirus	ICTV Mitoviridae SG (2021)	Cannabis sativa	BK010428	DAB41746
Ceratobasidium mitovirus 1	Duamitovirus cesp1	Duamitovirus	ICTV Mitoviridae SG (2021)	Ceratobasidium sp.	MN736968	QNN89183
Chenopodium quinoa mitovirus 1	Duamitovirus chqu1	Duamitovirus	ICTV Mitoviridae SG (2021)	Chenopodium quinoa	MF375475	AWL21855
Clitocybe odora virus	Duamitovirus clod1	Duamitovirus	ICTV Mitoviridae SG (2021)	Clitocybe odora	HE717021	CCG47524
Dahlia pinnata mitovirus 1	Duamitovirus dapi1	Duamitovirus	ICTV Mitoviridae SG (2021)	Dahlia pinnata	BK010429	DAB41747
Epicoccum nigrum mitovirus 1	Duamitovirus epni1	Duamitovirus	ICTV Mitoviridae SG (2021)	Epicoccum nigrum	MK584828	QDB74989
Fusarium boothii mitovirus 1	Duamitovirus fubo1	Duamitovirus	ICTV Mitoviridae SG (2021)	Fusarium boothii	LC425112	BBG56022
Fusarium poae mitovirus 3	Duamitovirus fupo3	Duamitovirus	ICTV Mitoviridae SG (2021)	Fusarium poae	LC150566	BAV56291
Fusarium poae mitovirus 4	Duamitovirus fupo4	Duamitovirus	ICTV Mitoviridae SG (2021)	Fusarium poae	LC150567	BAV56292
Gigaspora margarita mitovirus 1	Duamitovirus gima1	Duamitovirus	ICTV Mitoviridae SG (2021)	Gigaspora margarita	MG256173	AVA17449
Heterobasidion mitovirus 1	Duamitovirus hean1	Duamitovirus	ICTV Mitoviridae SG (2021)	Heterobasidion annosum	KJ873059	AIF33766
Heterobasidion mitovirus 3	Duamitovirus hean3	Duamitovirus	ICTV Mitoviridae SG (2021)	Heterobasidion annosum	MN058208	QED55406
Heterobasidion [parviporum] mitovirus 3	Duamitovirus hepa3	Duamitovirus	ICTV Mitoviridae SG (2021)	Heterobasidion parviporum	MN058214	QED55412
Humulus lupulus mitovirus 1	Duamitovirus hulu1	Duamitovirus	ICTV Mitoviridae SG (2021)	Humulus lupulus	BK010431	DAB41749
Nigrospora oryzae mitovirus 1	Duamitovirus nior1	Duamitovirus	ICTV Mitoviridae SG (2021)	Nigrospora oryzae	MH823901	AZP53928
Ophiostoma mitovirus 1a	Duamitovirus opno1a	Duamitovirus	ICTV Mitoviridae SG (2021)	Ophiostoma novo-ulmi	AM087548	CAJ32466
Ophiostoma mitovirus 1b	Duamitovirus opno1b	Duamitovirus	ICTV Mitoviridae SG (2021)	Ophiostoma novo-ulmi	AM087549	CAJ32467
Ophiostoma mitovirus 1c	Duamitovirus opno1c	Duamitovirus	ICTV Mitoviridae SG (2021)	Ophiostoma novo-ulmi	KF026355	AGT55876
Ophiostoma mitovirus 3b	Duamitovirus opno3b	Duamitovirus	ICTV Mitoviridae SG (2021)	Ophiostoma novo-ulmi	AM087550	CAJ32468
Oxybasis rubra mitovirus 1	Duamitovirus oxru1	Duamitovirus	ICTV Mitoviridae SG (2021)	Oxybasis rubra	BK010427	DAB41745
Petunia exserta mitovirus 1	Duamitovirus peex1	Duamitovirus	ICTV Mitoviridae SG (2021)	Petunia exserta	BK010426	DAB41744
Rhizoctonia solani mitovirus 21	Duamitovirus rhso21	Duamitovirus	ICTV Mitoviridae SG (2021)	Rhizoctonia solani	MK372892	QDW65413
Rhizoctonia solani mitovirus 25	Duamitovirus rhso25	Duamitovirus	ICTV Mitoviridae SG (2021)	Rhizoctonia solani	MK372894	QDW65415
Rhizoctonia solani mitovirus 31	Duamitovirus rhso31	Duamitovirus	ICTV Mitoviridae SG (2021)	Rhizoctonia solani	MK372900	QDW65421
Rhizoctonia solani mitovirus 32	Duamitovirus rhso32	Duamitovirus	ICTV Mitoviridae SG (2021)	Rhizoctonia solani	MK372901	QDW65422
Rhizophagus irregularis mitovirus 1	Duamitovirus rhir1	Duamitovirus	ICTV Mitoviridae SG (2021)	Rhizophagus irregularis	MH732933	AXY40444
Sclerotinia homoeocarpa mitovirus	Duamitovirus scho1	Duamitovirus	ICTV Mitoviridae SG (2021)	Sclerotinia homoeocarpa	AY172454	AAO21337
Sclerotinia nivalis mitovirus 2	Duamitovirus scni2	Duamitovirus	ICTV Mitoviridae SG (2021)	Sclerotinia nivalis	KT365896	ANJ77670
Sclerotinia sclerotiorum mitovirus 3	Duamitovirus scsc3	Duamitovirus	ICTV Mitoviridae SG (2021)	Sclerotinia sclerotiorum	JX401537	AGC24232
Sclerotinia sclerotiorum mitovirus 6	Duamitovirus scsc6	Duamitovirus	ICTV Mitoviridae SG (2021)	Sclerotinia sclerotiorum	KJ462512	AHX84133
Solanum chacoense mitovirus 1	Duamitovirus soch1	Duamitovirus	ICTV Mitoviridae SG (2021)	Solanum chacoense	BK010425	DAB41743
Tuber aestivum mitovirus	Duamitovirus tuae1	Duamitovirus	ICTV Mitoviridae SG (2021)	Tuber aestivum	HQ992989	AEG79311
Gigaspora margarita mitovirus 2	Duamitovirus gima2	Duamitovirus	ICTV Mitoviridae SG (2021)	Gigaspora margarita	MG256174	AVA17450
Gigaspora margarita mitovirus 3	Duamitovirus gima3	Duamitovirus	ICTV Mitoviridae SG (2021)	Gigaspora margarita	MG256175	AVA17451
Gigaspora margarita mitovirus 4	Duamitovirus gima4	Duamitovirus	ICTV Mitoviridae SG (2021)	Gigaspora margarita	MG256176	AVA17452
Mitovirus sp.	unassigned	proposal: "Large Duamitovirus"	Ezawa and cols. (2023)	unassigned	MN032703.1	QDH86473.1
Mitovirus sp.	unassigned	proposal: "Large Duamitovirus"	Ezawa and cols. (2023)	unassigned	MN036124.1	QDH91258.1
Mitoviridae sp.	unassigned	proposal: "Large Duamitovirus"	Ezawa and cols. (2023)	unassigned	MZ679876.1	UJQ92470.1
Mitoviridae contig	unassigned	proposal: "Large Duamitovirus"	Ezawa and cols. (2023)	unassigned	N/D	ND_032041 (RVMT_data)
Mitoviridae contig	unassigned	proposal: "Large Duamitovirus"	Ezawa and cols. (2023)	unassigned	N/D	ND_034080 (RVMT_data)
Mitoviridae contig	unassigned	proposal: "Large Duamitovirus"	Ezawa and cols. (2023)	unassigned	N/D	ND_039048 (RVMT_data)
Mitoviridae sp.	unassigned	proposal: "Large Duamitovirus"	Ezawa and cols. (2023)	unassigned	MZ679878.1	UJQ92472.1
Mitoviridae sp.	unassigned	proposal: "Large Duamitovirus"	Ezawa and cols. (2023)	unassigned	MZ680008.1	UJQ92588.1
Mitoviridae contig	unassigned	proposal: "Large Duamitovirus"	Ezawa and cols. (2023)	unassigned	N/D	ND_179602 (RVMT_data)
Mitoviridae contig	unassigned	proposal: "Large Duamitovirus"	Ezawa and cols. (2023)	unassigned	N/D	ND_207241 (RVMT_data)
Ceratobasidium mitovirus A	Triamitovirus cespA	Triamitovirus	ICTV Mitoviridae SG (2021)	Ceratobasidium sp.	KU291923	AOX47577
Geopora sumneriana mitovirus 1	Triamitovirus gesu1	Triamitovirus	ICTV Mitoviridae SG (2021)	Geopora sumneriana	MN043682	QDM55307
Rhizoctonia oryzae-sativae mitovirus 1	Triamitovirus rhor1	Triamitovirus	ICTV Mitoviridae SG (2021)	Rhizoctonia oryzae-sativae	KU057949	ANA08076
Rhizoctonia mitovirus 1 RS002	Triamitovirus rhso1	Triamitovirus	ICTV Mitoviridae SG (2021)	Rhizoctonia solani	KC792591	AHL25281
Rhizoctonia solani mitovirus 23	Triamitovirus rhso23	Triamitovirus	ICTV Mitoviridae SG (2021)	Rhizoctonia solani	MK375261	QDW65458
Rhizoctonia solani mitovirus 30	Triamitovirus rhso30	Triamitovirus	ICTV Mitoviridae SG (2021)	Rhizoctonia solani	MK372899	QDW65420
Rhizoctonia solani mitovirus 39	Triamitovirus rhso39	Triamitovirus	ICTV Mitoviridae SG (2021)	Rhizoctonia solani	MN448505	QIS79099
Rhizophagus sp. RF1 mitovirus	Triamitovirus rhcl1	Triamitovirus	ICTV Mitoviridae SG (2021)	Rhizophagus clarus	AB558120	BAJ23143
Tuber excavatum mitovirus	Triamitovirus tuex1	Triamitovirus	ICTV Mitoviridae SG (2021)	Tuber excavatum	JN222389	AEP83726
Ophiostoma mitovirus 7	Kvaramitovirus opno7	Kvaramitovirus	ICTV Mitoviridae SG (2021)	Ophiostoma novo-ulmi	KF031943	AGT55877 (YP_010799133.1)
Grapevine-associated mitovirus 12	unassigned	proposal: Kvaramitovirus	Jacquat and cols. (2023)	unassigned	MW648459.1	QXN75365.1
Grapevine-associated mitovirus 11	unassigned	proposal: Kvaramitovirus	Jacquat and cols. (2023)	unassigned	MW648458.1	QXN75364.1
Fusarium asiaticum mitovirus 8	unassigned	proposal: Kvaramitovirus	Jacquat and cols. (2023)	Fusarium asiaticum	MZ969058.1	UNG44319.1
Halichondria panicea associated mitovirus 1	unassigned	proposal: Kvaramitovirus	Jacquat and cols. (2024)	unassigned	BK062826.1	DBA06305.1
Fusarium asiaticum mitovirus 7	unassigned	proposal: Kvaramitovirus	Jacquat and cols. (2024)	Fusarium asiaticum	MZ969057.1	UNG44318.1
Grapevine-associated mitovirus 13	unassigned	proposal: Kvaramitovirus	Jacquat and cols. (2024)	unassigned	MW648460.1	QXN75366.1
Grapevine-associated mitovirus 14	unassigned	proposal: Kvaramitovirus	Jacquat and cols. (2024)	unassigned	MW648461.1	QXN75367.1
Hymenoscyphus fraxineus mitovirus 2	unassigned	proposal: Kvaramitovirus	Jacquat and cols. (2024)	Hymenoscyphus fraxineus	ON929979.1	UTR30267.1
Mitovirus sp. isolate H3_Bulk_Litter_16_893	unassigned	proposal: Kvaramitovirus	Jacquat and cols. (2024)	unassigned	MN035528.1	QDH90424.1
Mitovirus sp. isolate H4_Rhizo_43_scaffold_1573	unassigned	proposal: Kvaramitovirus	Jacquat and cols. (2024)	unassigned	MN034141.1	QDH88501.1
Wenling narna-like virus 9	unassigned	proposal: genus "Kvinmitovirus"	Jacquat and cols. (2022)	crustacean	KX883604.1	APG77262.1
Lutzomyia longipalpis mitovirus 1 (LulMV1)	unassigned	proposal: genus "Kvinmitovirus"	Jacquat and cols. (2022)	Lutzomyia longipalpis	BK013136.1	DAD49837.1
Plasmopara viticola lesion associated mitovirus 56 (PVaMito56)	unassigned	proposal: genus "Kvinmitovirus"	Jacquat and cols. (2022)	Plasmopara viticola	MN539817.1	QIR30279.1
Soybean thrips mito-like virus 2 (STMLV2)	unassigned	proposal: genus "Kvinmitovirus"	Jacquat and cols. (2022)	Neohydatothrips variabilis	MT293145.1	QQP18722.1
Nebalia bipes mitovirus 1	unassigned	proposal: genus "Kvinmitovirus"	Jacquat and cols. (2022)	Nebalia bipes	BK061371.1	DAZ90606.1
Hanseniella sp mitovirus 1	unassigned	proposal: genus "Kvinmitovirus"	Jacquat and cols. (2022)	Hanseniella sp	BK061473.1	DAZ90608.1
Glomeridella minima mitovirus 1	unassigned	proposal: genus "Kvinmitovirus"	Jacquat and cols. (2022)	Glomeridella minima	BK061472.1	DAZ90607.1
Egaenus convexus mitovirus 1	unassigned	proposal: genus "Kvinmitovirus"	Jacquat and cols. (2022)	Egaenus convexus	BK061474.1	DAZ90609.1
Kensystermes virus	unassigned	proposal: genus "Kvinmitovirus"	Jacquat and cols. (2022)	Cephalotermes	MW052133.1	QQM16244.1
Lunsystermes virus	unassigned	proposal: genus "Kvinmitovirus"	Jacquat and cols. (2022)	Embiratermes neotenicus	MW052138.1	QQM16246.1
Rinsystermes virus	unassigned	proposal: genus "Kvinmitovirus"	Jacquat and cols. (2022)	Cornitermes	MW052136.1	QQM16245.1
Wunsystermes virus	unassigned	proposal: genus "Kvinmitovirus"	Jacquat and cols. (2022)	Occasitermes sp	QQM16242.1	MW052093.1
Thrips tabaci associated mitovirus 1	unassigned	proposal: genus "Kvinmitovirus"	Jacquat and cols. (2022)	Thrips tabaci	MN714680.1	QNM37825.1
Halichondria panicea mitovirus 1	unassigned	proposal: genus "Kvinmitovirus"	Jacquat and cols. (2022)	Halichondria panicea	BK061365.1	DAZ90600.1
Halichondria panicea mitovirus 2	unassigned	proposal: genus "Kvinmitovirus"	Jacquat and cols. (2022)	Halichondria panicea	BK061366.1	DAZ90601.1
Halisarca dujardinii mitovirus 1	unassigned	proposal: genus "Kvinmitovirus"	Jacquat and cols. (2022)	Halisarca dujardinii	BK061367.1	DAZ90602.1
Henricia sp. mitovirus 1	unassigned	proposal: genus "Kvinmitovirus"	Jacquat and cols. (2022)	Henricia sp	BK061369.1	DAZ90604.1
Tigriopus californicus mitovirus 1	unassigned	proposal: genus "Kvinmitovirus"	Jacquat and cols. (2022)	Tigriopus californicus	BK061370.1	DAZ90605.1
Calvadosia cruxmelitensis mitovirus 1	unassigned	proposal: genus "Kvinmitovirus"	Jacquat and cols. (2022)	Calvadosia cruxmelitensis	BK061368.1	DAZ90603.1
Barns Ness breadcrumb sponge narna like virus 1	unassigned	proposal: subfamily "Arkeomitovirinae"	Jacquat and cols. (2024)	Halichondria panicea	MF190027.1	ASM94066.1
Barns Ness breadcrumb sponge narna like virus 2	unassigned	proposal: subfamily "Arkeomitovirinae"	Jacquat and cols. (2024)	Halichondria panicea	MF190028.1	ASM94067.1
Barns Ness breadcrumb sponge narna like virus 3	unassigned	proposal: subfamily "Arkeomitovirinae"	Jacquat and cols. (2024)	Halichondria panicea	MF190029.1	ASM94068.1
Barns Ness serrated wrack narna like virus 1	unassigned	proposal: subfamily "Arkeomitovirinae"	Jacquat and cols. (2024)	Fucus serratus	MF190052.1	ASM94097.1
Melbourne fly narnavirus 1	unassigned	proposal: subfamily "Arkeomitovirinae"	Jacquat and cols. (2024)	Drosophila melanogaster	MH384387.1	AWY11206.1
Aplysina aerophoba associated mitovirus 1	unassigned	proposal: subfamily "Arkeomitovirinae"	Jacquat and cols. (2024)	Aplysina aerophoba	HBWR010342209.1	BK062827.1
Ulva lactuca associated mitovirus 1	unassigned	proposal: subfamily "Arkeomitovirinae"	Jacquat and cols. (2024)	Ulva lactuca	GFTX01082149.1	BK062828.1
Austropotamobius pallipes associated mitovirus 1	unassigned	proposal: subfamily "Arkeomitovirinae"	Jacquat and cols. (2024)	Austropotamobius pallipes	GICG01006928.1	BK062829.1
Gigantidas vrijenhoeki associated mitovirus 1	unassigned	proposal: subfamily "Arkeomitovirinae"	Jacquat and cols. (2024)	Gigantidas vrijenhoeki	GIIM01102748.1	BK062830.1
Psammomys obesus associated mitovirus 1	unassigned	proposal: subfamily "Arkeomitovirinae"	Jacquat and cols. (2024)	Psammomys obesus	GEAB01124828.1	BK062831.1
Polycarpa mytiligera associated mitovirus 1	unassigned	proposal: subfamily "Arkeomitovirinae"	Jacquat and cols. (2024)	Polycarpa mytiligera	GIUT01051606.1	BK062832.1
Mitovirus sp	unassigned	proposal: subfamily "Arkeomitovirinae"	Jacquat and cols. (2024)	unassigned	MN034372.1	QDH88794.1
Orin narna like virus	unassigned	proposal: subfamily "Arkeomitovirinae"	Jacquat and cols. (2024)	Oryctolagus cuniculus	MT129701.1	QIJ70059.1
Orin narna like virus	unassigned	proposal: subfamily "Arkeomitovirinae"	Jacquat and cols. (2024)	Oryctolagus cuniculus	MT129702.1	QIJ70060.1
Wyatt narna like virus	unassigned	proposal: subfamily "Arkeomitovirinae"	Jacquat and cols. (2024)	Oryctolagus cuniculus	MT129713.1	QIJ70072.1
Halley virus	unassigned	proposal: subfamily "Arkeomitovirinae"	Jacquat and cols. (2024)	Pygoscelis antarcticus	MT025089.1	QIS87961.1
Kagge virus	unassigned	proposal: subfamily "Arkeomitovirinae"	Jacquat and cols. (2024)	Pygoscelis antarcticus	MT025091.1	QIS87963.1
Biscoe virus	unassigned	proposal: subfamily "Arkeomitovirinae"	Jacquat and cols. (2024)	Pygoscelis adeliae	MT025132.1	QIS88016.1
le Maire virus	unassigned	proposal: subfamily "Arkeomitovirinae"	Jacquat and cols. (2024)	Pygoscelis adeliae	MT025133.1	QIS88017.1
de Lozier virus	unassigned	proposal: subfamily "Arkeomitovirinae"	Jacquat and cols. (2024)	Pygoscelis adeliae	MT025136.1	QIS88020.1
de Nodal virus	unassigned	proposal: subfamily "Arkeomitovirinae"	Jacquat and cols. (2024)	Pygoscelis adeliae	MT025159.1	QIS88049.1
Punsystermes virus	unassigned	proposal: subfamily "Arkeomitovirinae"	Jacquat and cols. (2024)	Occasitermes sp. 1 Coloni A	MW052079.1	QQM16269.1
Ansystermes virus	unassigned	proposal: subfamily "Arkeomitovirinae"	Jacquat and cols. (2024)	Occasitermes sp. 1 Coloni B	MW052087.1	QQM16280.1
Konsystermes virus	unassigned	proposal: subfamily "Arkeomitovirinae"	Jacquat and cols. (2024)	Occasitermes sp. 1 Coloni B	MW052094.1	QQM16292.1
Jansystermes virus	unassigned	proposal: subfamily "Arkeomitovirinae"	Jacquat and cols. (2024)	Mastotermes darwiniensis colony A	MW052118.1	QQM16317.1
Mensystermes virus	unassigned	proposal: subfamily "Arkeomitovirinae"	Jacquat and cols. (2024)	Heterotermes ferox colony A	MW052064.1	QRW42882.1
Mansystermes virus	unassigned	proposal: subfamily "Arkeomitovirinae"	Jacquat and cols. (2024)	Mastotermes darwiniensis colony A	MW052115.1	QRW42892.1
Hangzhou mitovirus 1	unassigned	proposal: subfamily "Arkeomitovirinae"	Jacquat and cols. (2024)	Cipangopaludina cathayensis	MZ209675.1	UHK03164.1
Henan mitolike virus 3	unassigned	proposal: subfamily "Arkeomitovirinae"	Jacquat and cols. (2024)	unassigned	MZ679851.1	UJQ92450.1
Guangdong mitolike virus	unassigned	proposal: subfamily "Arkeomitovirinae"	Jacquat and cols. (2024)	unassigned	MZ679881.1	UJQ92475.1
Jiangsu sediment mitolike virus 2	unassigned	proposal: subfamily "Arkeomitovirinae"	Jacquat and cols. (2024)	unassigned	MZ679897.1	UJQ92488.1
Mitoviridae sp.	unassigned	proposal: subfamily "Arkeomitovirinae"	Jacquat and cols. (2024)	unassigned	MZ679968.1	UJQ92550.1
Guangxi mitolike virus 11	unassigned	proposal: subfamily "Arkeomitovirinae"	Jacquat and cols. (2024)	unassigned	MZ679995.1	UJQ92576.1
Henan mitolike virus 15	unassigned	proposal: subfamily "Arkeomitovirinae"	Jacquat and cols. (2024)	unassigned	MZ680003.1	UJQ92584.1
Yunnan sediment mitolike virus 2	unassigned	proposal: subfamily "Arkeomitovirinae"	Jacquat and cols. (2024)	unassigned	MZ680017.1	UJQ92596.1
Sichuan sediment mitolike virus 4	unassigned	proposal: subfamily "Arkeomitovirinae"	Jacquat and cols. (2024)	unassigned	MZ680028.1	UJQ92606.1
Sichuan sediment mitolike virus 5	unassigned	proposal: subfamily "Arkeomitovirinae"	Jacquat and cols. (2024)	unassigned	MZ680031.1	UJQ92609.1
Guangxi mitolike virus 9 306R-k141-387249	unassigned	proposal: subfamily "Arkeomitovirinae"	Jacquat and cols. (2024)	unassigned	MZ679962.1	UOL49050.1
Heilongjiang sediment mitolike virus 2	unassigned	proposal: subfamily "Arkeomitovirinae"	Jacquat and cols. (2024)	unassigned	MZ680049.1	UOL49058.1
Leviviridae sp.	unassigned	proposal: subfamily "Arkeomitovirinae"	Jacquat and cols. (2024)	unassigned	ON163204.1	URG15843.1
Leviviridae sp.	unassigned	proposal: subfamily "Arkeomitovirinae"	Jacquat and cols. (2024)	unassigned	ON164320.1	URG16528.1
Lilsebastian_narnalike_virus	unassigned	proposal: subfamily "Arkeomitovirinae"	Jacquat and cols. (2024)	unassigned	MT129699.1	QIJ70057.1
Mitoviridae sp	unassigned	proposal: subfamily "Arkeomitovirinae"	Jacquat and cols. (2024)	unassigned	ON162559.1	URG16540.1
Mitoviridae sp	unassigned	proposal: subfamily "Arkeomitovirinae"	Jacquat and cols. (2024)	unassigned	ON162847.1	URG16542.1
Mitoviridae sp	unassigned	proposal: subfamily "Arkeomitovirinae"	Jacquat and cols. (2024)	unassigned	ON163353.1	URG16546.1
Mitoviridae sp	unassigned	proposal: subfamily "Arkeomitovirinae"	Jacquat and cols. (2024)	unassigned	ON163659.1	URG16549.1
Mitoviridae sp	unassigned	proposal: subfamily "Arkeomitovirinae"	Jacquat and cols. (2024)	unassigned	ON163964.1	URG16646.1
Mitoviridae sp	unassigned	proposal: subfamily "Arkeomitovirinae"	Jacquat and cols. (2024)	unassigned	ON164005.1	URG16687.1
Mitoviridae sp	unassigned	proposal: subfamily "Arkeomitovirinae"	Jacquat and cols. (2024)	unassigned	ON164077.1	URG16752.1
Mitoviridae sp	unassigned	proposal: subfamily "Arkeomitovirinae"	Jacquat and cols. (2024)	unassigned	ON164078.1	URG16753.1
Mitoviridae sp	unassigned	proposal: subfamily "Arkeomitovirinae"	Jacquat and cols. (2024)	unassigned	ON164087.1	URG16755.1
Mitoviridae sp	unassigned	proposal: subfamily "Arkeomitovirinae"	Jacquat and cols. (2024)	unassigned	ON164092.1	URG16756.1
Mitoviridae sp	unassigned	proposal: subfamily "Arkeomitovirinae"	Jacquat and cols. (2024)	unassigned	ON164094.1	URG16758.1
Mitoviridae sp	unassigned	proposal: subfamily "Arkeomitovirinae"	Jacquat and cols. (2024)	unassigned	ON164100.1	URG16760.1
Mitoviridae sp	unassigned	proposal: subfamily "Arkeomitovirinae"	Jacquat and cols. (2024)	unassigned	ON164104.1	URG16762.1
Mitoviridae sp	unassigned	proposal: subfamily "Arkeomitovirinae"	Jacquat and cols. (2024)	unassigned	ON164106.1	URG16763.1
Mitoviridae sp	unassigned	proposal: subfamily "Arkeomitovirinae"	Jacquat and cols. (2024)	unassigned	ON164107.1	URG16764.1
Mitoviridae sp	unassigned	proposal: subfamily "Arkeomitovirinae"	Jacquat and cols. (2024)	unassigned	ON164114.1	URG16766.1
Mitoviridae sp	unassigned	proposal: subfamily "Arkeomitovirinae"	Jacquat and cols. (2024)	unassigned	ON164115.1	URG16767.1
Mitoviridae sp	unassigned	proposal: subfamily "Arkeomitovirinae"	Jacquat and cols. (2024)	unassigned	ON164122.1	URG16770.1
Mitoviridae sp	unassigned	proposal: subfamily "Arkeomitovirinae"	Jacquat and cols. (2024)	unassigned	ON164123.1	URG16771.1
Mitoviridae sp	unassigned	proposal: subfamily "Arkeomitovirinae"	Jacquat and cols. (2024)	unassigned	ON164131.1	URG16776.1
Mitoviridae sp	unassigned	proposal: subfamily "Arkeomitovirinae"	Jacquat and cols. (2024)	unassigned	ON164132.1	URG16777.1
Mitoviridae sp	unassigned	proposal: subfamily "Arkeomitovirinae"	Jacquat and cols. (2024)	unassigned	ON164171.1	URG16778.1
Mitoviridae sp	unassigned	proposal: subfamily "Arkeomitovirinae"	Jacquat and cols. (2024)	unassigned	ON164175.1	URG16780.1
Mitoviridae sp	unassigned	proposal: subfamily "Arkeomitovirinae"	Jacquat and cols. (2024)	unassigned	ON164184.1	URG16782.1
Mitoviridae sp	unassigned	proposal: subfamily "Arkeomitovirinae"	Jacquat and cols. (2024)	unassigned	ON164191.1	URG16786.1
Mitoviridae sp	unassigned	proposal: subfamily "Arkeomitovirinae"	Jacquat and cols. (2024)	unassigned	ON164458.1	URG16868.1
Mitoviridae sp	unassigned	proposal: subfamily "Arkeomitovirinae"	Jacquat and cols. (2024)	unassigned	ON164196.1	URG16787.1
Mitoviridae sp	unassigned	proposal: subfamily "Arkeomitovirinae"	Jacquat and cols. (2024)	unassigned	ON164204.1	URG16789.1
Mitoviridae sp	unassigned	proposal: subfamily "Arkeomitovirinae"	Jacquat and cols. (2024)	unassigned	ON164212.1	URG16791.1
Mitoviridae sp	unassigned	proposal: subfamily "Arkeomitovirinae"	Jacquat and cols. (2024)	unassigned	ON164214.1	URG16792.1
Mitoviridae sp	unassigned	proposal: subfamily "Arkeomitovirinae"	Jacquat and cols. (2024)	unassigned	ON164218.1	URG16793.1
Mitoviridae sp	unassigned	proposal: subfamily "Arkeomitovirinae"	Jacquat and cols. (2024)	unassigned	ON164214.1	URG16793.1
Mitoviridae sp	unassigned	proposal: subfamily "Arkeomitovirinae"	Jacquat and cols. (2024)	unassigned	ON164220.1	URG16794.1
Mitoviridae sp	unassigned	proposal: subfamily "Arkeomitovirinae"	Jacquat and cols. (2024)	unassigned	ON164237.1	URG16797.1
Mitoviridae sp	unassigned	proposal: subfamily "Arkeomitovirinae"	Jacquat and cols. (2024)	unassigned	ON164239.1	URG16798.1
Mitoviridae sp	unassigned	proposal: subfamily "Arkeomitovirinae"	Jacquat and cols. (2024)	unassigned	ON164241.1	URG16800.1
Mitoviridae sp	unassigned	proposal: subfamily "Arkeomitovirinae"	Jacquat and cols. (2024)	unassigned	ON164244.1	URG16801.1
Mitoviridae sp	unassigned	proposal: subfamily "Arkeomitovirinae"	Jacquat and cols. (2024)	unassigned	ON164249.1	URG16805.1
Mitoviridae sp	unassigned	proposal: subfamily "Arkeomitovirinae"	Jacquat and cols. (2024)	unassigned	ON164251.1	URG16806.1
Mitoviridae sp	unassigned	proposal: subfamily "Arkeomitovirinae"	Jacquat and cols. (2024)	unassigned	ON164255.1	URG16808.1
Mitoviridae sp	unassigned	proposal: subfamily "Arkeomitovirinae"	Jacquat and cols. (2024)	unassigned	ON164301.1	URG16820.1
Mitoviridae sp	unassigned	proposal: subfamily "Arkeomitovirinae"	Jacquat and cols. (2024)	unassigned	ON164314.1	URG16823.1
Mitoviridae sp	unassigned	proposal: subfamily "Arkeomitovirinae"	Jacquat and cols. (2024)	unassigned	ON164329.1	URG16828.1
Mitoviridae sp	unassigned	proposal: subfamily "Arkeomitovirinae"	Jacquat and cols. (2024)	unassigned	ON164333.1	URG16829.1
Mitoviridae sp	unassigned	proposal: subfamily "Arkeomitovirinae"	Jacquat and cols. (2024)	unassigned	ON164334.1	URG16830.1
Mitoviridae sp	unassigned	proposal: subfamily "Arkeomitovirinae"	Jacquat and cols. (2024)	unassigned	ON164335.1	URG16831.1
Mitoviridae sp	unassigned	proposal: subfamily "Arkeomitovirinae"	Jacquat and cols. (2024)	unassigned	ON164336.1	URG16832.1
Mitoviridae sp	unassigned	proposal: subfamily "Arkeomitovirinae"	Jacquat and cols. (2024)	unassigned	ON164352.1	URG16838.1
Mitoviridae sp	unassigned	proposal: subfamily "Arkeomitovirinae"	Jacquat and cols. (2024)	unassigned	ON164364.1	URG16840.1
Mitoviridae sp	unassigned	proposal: subfamily "Arkeomitovirinae"	Jacquat and cols. (2024)	unassigned	ON164366.1	URG16841.1
Mitoviridae sp	unassigned	proposal: subfamily "Arkeomitovirinae"	Jacquat and cols. (2024)	unassigned	ON164367.1	URG16842.1
Mitoviridae sp	unassigned	proposal: subfamily "Arkeomitovirinae"	Jacquat and cols. (2024)	unassigned	ON164377.1	URG16844.1
Mitoviridae sp	unassigned	proposal: subfamily "Arkeomitovirinae"	Jacquat and cols. (2024)	unassigned	ON164380.1	URG16846.1
Mitoviridae sp	unassigned	proposal: subfamily "Arkeomitovirinae"	Jacquat and cols. (2024)	unassigned	ON164381.1	URG16847.1
Mitoviridae sp	unassigned	proposal: subfamily "Arkeomitovirinae"	Jacquat and cols. (2024)	unassigned	ON164384.1	URG16849.1
Mitoviridae sp	unassigned	proposal: subfamily "Arkeomitovirinae"	Jacquat and cols. (2024)	unassigned	ON164402.1	URG16852.1
Mitoviridae sp	unassigned	proposal: subfamily "Arkeomitovirinae"	Jacquat and cols. (2024)	unassigned	ON164416.1	URG16854.1
Mitoviridae sp	unassigned	proposal: subfamily "Arkeomitovirinae"	Jacquat and cols. (2024)	unassigned	ON164422.1	URG16855.1
Mitoviridae sp	unassigned	proposal: subfamily "Arkeomitovirinae"	Jacquat and cols. (2024)	unassigned	ON164434.1	URG16858.1
Mitoviridae sp	unassigned	proposal: subfamily "Arkeomitovirinae"	Jacquat and cols. (2024)	unassigned	ON164439.1	URG16860.1
Mitoviridae sp	unassigned	proposal: subfamily "Arkeomitovirinae"	Jacquat and cols. (2024)	unassigned	ON164441.1	URG16861.1
Mitoviridae sp	unassigned	proposal: subfamily "Arkeomitovirinae"	Jacquat and cols. (2024)	unassigned	ON164443.1	URG16862.1
Mitoviridae sp	unassigned	proposal: subfamily "Arkeomitovirinae"	Jacquat and cols. (2024)	unassigned	ON164450.1	URG16864.1
Mitoviridae sp	unassigned	proposal: subfamily "Arkeomitovirinae"	Jacquat and cols. (2024)	unassigned	ON164453.1	URG16865.1
Mitoviridae sp	unassigned	proposal: subfamily "Arkeomitovirinae"	Jacquat and cols. (2024)	unassigned	ON164454.1	URG16866.1
Mitoviridae sp	unassigned	proposal: subfamily "Arkeomitovirinae"	Jacquat and cols. (2024)	unassigned	ON164456.1	URG16867.1
Mitoviridae sp	unassigned	proposal: subfamily "Arkeomitovirinae"	Jacquat and cols. (2024)	unassigned	ON164459.1	URG16869.1
Mitoviridae sp	unassigned	proposal: subfamily "Arkeomitovirinae"	Jacquat and cols. (2024)	unassigned	ON164464.1	URG16870.1
Mitoviridae sp	unassigned	proposal: subfamily "Arkeomitovirinae"	Jacquat and cols. (2024)	unassigned	ON164476.1	URG16874.1
Mitoviridae sp	unassigned	proposal: subfamily "Arkeomitovirinae"	Jacquat and cols. (2024)	unassigned	ON164486.1	URG16878.1
Mitoviridae sp	unassigned	proposal: subfamily "Arkeomitovirinae"	Jacquat and cols. (2024)	unassigned	ON164487.1	URG16879.1
Narnaviridae sp	unassigned	proposal: subfamily "Arkeomitovirinae"	Jacquat and cols. (2024)	unassigned	ON164137.1	URG16926.1
Narnaviridae sp	unassigned	proposal: subfamily "Arkeomitovirinae"	Jacquat and cols. (2024)	unassigned	ON164140.1	URG16929.1
Narnaviridae sp	unassigned	proposal: subfamily "Arkeomitovirinae"	Jacquat and cols. (2024)	unassigned	ON164142.1	URG16931.1
Narnaviridae sp	unassigned	proposal: subfamily "Arkeomitovirinae"	Jacquat and cols. (2024)	unassigned	ON164149.1	URG16937.1
Narnaviridae sp	unassigned	proposal: subfamily "Arkeomitovirinae"	Jacquat and cols. (2024)	unassigned	ON164150.1	URG16938.1
Narnaviridae sp	unassigned	proposal: subfamily "Arkeomitovirinae"	Jacquat and cols. (2024)	unassigned	ON164152.1	URG16940.1
Narnaviridae sp	unassigned	proposal: subfamily "Arkeomitovirinae"	Jacquat and cols. (2024)	unassigned	ON164153.1	URG16941.1
Narnaviridae sp	unassigned	proposal: subfamily "Arkeomitovirinae"	Jacquat and cols. (2024)	unassigned	ON164155.1	URG16943.1
Narnaviridae sp	unassigned	proposal: subfamily "Arkeomitovirinae"	Jacquat and cols. (2024)	unassigned	ON164157.1	URG16945.1
Narnaviridae sp	unassigned	proposal: subfamily "Arkeomitovirinae"	Jacquat and cols. (2024)	unassigned	ON164159.1	URG16946.1
Narnaviridae sp	unassigned	proposal: subfamily "Arkeomitovirinae"	Jacquat and cols. (2024)	unassigned	ON164162.1	URG16948.1
La_Roche_virus	unassigned	proposal: subfamily "Arkeomitovirinae"	Jacquat and cols. (2024)	unassigned	MT025134.1	QIS88018.1
Schouten_virus	unassigned	proposal: subfamily "Arkeomitovirinae"	Jacquat and cols. (2024)	unassigned	MT025079.1	QIS87948.1
Smith virus	unassigned	proposal: subfamily "Arkeomitovirinae"	Jacquat and cols. (2024)	unassigned	MT025088.1	QIS87960.1
Mitovirus_JS5	unassigned	proposal: subfamily "Arkeomitovirinae"	Jacquat and cols. (2024)	unassigned	MN780847.1	QHA33931.1
Monsystermes_virus	unassigned	proposal: subfamily "Arkeomitovirinae"	Jacquat and cols. (2024)	unassigned	MW052092.1	QQM16291.1
Sanya mito-like virus 1	unassigned	proposal: subfamily "Arkeomitovirinae"	Jacquat and cols. (2024)	Dinebra chinensis	OM514563.1	UUW21442.1
Beihai narna-like virus 26	unassigned	proposal: subfamily "Arkeomitovirinae"	Jacquat and cols. (2024)	Styela plicata and Stolidobranchia sp.	KX883467.1	YP009333146.1
NODE 1118	unassigned	unassigned	Begeman and cols. (2023)	unassigned	NODE 1118	NODE 1118
NODE 1155	unassigned	unassigned	Begeman and cols. (2023)	unassigned	NODE 1155	NODE 1155
NODE 1178	unassigned	unassigned	Begeman and cols. (2023)	unassigned	NODE 1178	NODE 1178
NODE 1583	unassigned	unassigned	Begeman and cols. (2023)	unassigned	NODE 1583	NODE 1583
NODE 1758	unassigned	unassigned	Begeman and cols. (2023)	unassigned	NODE 1758	NODE 1758
NODE 1838	unassigned	unassigned	Begeman and cols. (2023)	unassigned	NODE 1838	NODE 1838
NODE 1977	unassigned	unassigned	Begeman and cols. (2023)	unassigned	NODE 1977	NODE 1977
NODE 2187	unassigned	unassigned	Begeman and cols. (2023)	unassigned	NODE 2187	NODE 2187
NODE 2281	unassigned	unassigned	Begeman and cols. (2023)	unassigned	NODE 2281	NODE 2281
NODE 2484	unassigned	unassigned	Begeman and cols. (2023)	unassigned	NODE 2484	NODE 2484
NODE 857	unassigned	unassigned	Begeman and cols. (2023)	unassigned	NODE 857	NODE 857
NODE 949	unassigned	unassigned	Begeman and cols. (2023)	unassigned	NODE 949	NODE 949
NODE 978	unassigned	unassigned	Begeman and cols. (2023)	unassigned	NODE 978	NODE 978
NODE 982	unassigned	unassigned	Begeman and cols. (2023)	unassigned	NODE 982	NODE 982
NODE 148	unassigned	unassigned	Begeman and cols. (2023)	unassigned	NODE 148	NODE 148
NODE 20	unassigned	unassigned	Begeman and cols. (2023)	unassigned	NODE 20	NODE 20
NODE 561	unassigned	unassigned	Begeman and cols. (2023)	unassigned	NODE 561	NODE 561
NODE 963	unassigned	unassigned	Begeman and cols. (2023)	unassigned	NODE 963	NODE 963
NODE 1194	unassigned	unassigned	Begeman and cols. (2023)	unassigned	NODE 1194	NODE 1194
NODE 1451	unassigned	unassigned	Begeman and cols. (2023)	unassigned	NODE 1451	NODE 1451
NODE 1937	unassigned	unassigned	Begeman and cols. (2023)	unassigned	NODE 1937	NODE 1937
NODE 228	unassigned	unassigned	Begeman and cols. (2023)	unassigned	NODE 228	NODE 228
NODE 437	unassigned	unassigned	Begeman and cols. (2023)	unassigned	NODE 437	NODE 437
NODE 540	unassigned	unassigned	Begeman and cols. (2023)	unassigned	NODE 540	NODE 540
NODE 1175	unassigned	unassigned	Begeman and cols. (2023)	unassigned	NODE 1175	NODE 1175
NODE 2326	unassigned	unassigned	Begeman and cols. (2023)	unassigned	NODE 2326	NODE 2326
NODE 239	unassigned	unassigned	Begeman and cols. (2023)	unassigned	NODE 239	NODE 239
NODE 369	unassigned	unassigned	Begeman and cols. (2023)	unassigned	NODE 369	NODE 369
NODE 836	unassigned	unassigned	Begeman and cols. (2023)	unassigned	NODE 836	NODE 836
NODE 12346	unassigned	unassigned	Begeman and cols. (2023)	unassigned	NODE 12346	NODE 12346
NODE 1526	unassigned	unassigned	Begeman and cols. (2023)	unassigned	NODE 1526	NODE 1526
NODE 1760	unassigned	unassigned	Begeman and cols. (2023)	unassigned	NODE 1760	NODE 1760
NODE 1764	unassigned	unassigned	Begeman and cols. (2023)	unassigned	NODE 1764	NODE 1764
NODE 1819	unassigned	unassigned	Begeman and cols. (2023)	unassigned	NODE 1819	NODE 1819
NODE 1828	unassigned	unassigned	Begeman and cols. (2023)	unassigned	NODE 1828	NODE 1828
NODE 2241	unassigned	unassigned	Begeman and cols. (2023)	unassigned	NODE 2241	NODE 2241
NODE 2321	unassigned	unassigned	Begeman and cols. (2023)	unassigned	NODE 2321	NODE 2321
NODE 3332	unassigned	unassigned	Begeman and cols. (2023)	unassigned	NODE 3332	NODE 3332
NODE 3356	unassigned	unassigned	Begeman and cols. (2023)	unassigned	NODE 3356	NODE 3356
NODE 8065	unassigned	unassigned	Begeman and cols. (2023)	unassigned	NODE 8065	NODE 8065
NODE 8673	unassigned	unassigned	Begeman and cols. (2023)	unassigned	NODE 8673	NODE 8673
NODE 9600	unassigned	unassigned	Begeman and cols. (2023)	unassigned	NODE 9600	NODE 9600
NODE 104621	unassigned	unassigned	Begeman and cols. (2023)	unassigned	NODE 104621	NODE 104621
NODE 108703	unassigned	unassigned	Begeman and cols. (2023)	unassigned	NODE 108703	NODE 108703
NODE 121858	unassigned	unassigned	Begeman and cols. (2023)	unassigned	NODE 121858	NODE 121858
NODE 143083	unassigned	unassigned	Begeman and cols. (2023)	unassigned	NODE 143083	NODE 143083
NODE 14594	unassigned	unassigned	Begeman and cols. (2023)	unassigned	NODE 14594	NODE 14594
NODE 14595	unassigned	unassigned	Begeman and cols. (2023)	unassigned	NODE 14595	NODE 14595
NODE 14596	unassigned	unassigned	Begeman and cols. (2023)	unassigned	NODE 14596	NODE 14596
NODE 165515	unassigned	unassigned	Begeman and cols. (2023)	unassigned	NODE 165515	NODE 165515
NODE 19193	unassigned	unassigned	Begeman and cols. (2023)	unassigned	NODE 19193	NODE 19193
NODE 21711	unassigned	unassigned	Begeman and cols. (2023)	unassigned	NODE 21711	NODE 21711
NODE 22342	unassigned	unassigned	Begeman and cols. (2023)	unassigned	NODE 22342	NODE 22342
NODE 22487	unassigned	unassigned	Begeman and cols. (2023)	unassigned	NODE 22487	NODE 22487
NODE 22730	unassigned	unassigned	Begeman and cols. (2023)	unassigned	NODE 22730	NODE 22730
NODE 22741	unassigned	unassigned	Begeman and cols. (2023)	unassigned	NODE 22741	NODE 22741
NODE 23281	unassigned	unassigned	Begeman and cols. (2023)	unassigned	NODE 23281	NODE 23281
NODE 24905	unassigned	unassigned	Begeman and cols. (2023)	unassigned	NODE 24905	NODE 24905
NODE 25648	unassigned	unassigned	Begeman and cols. (2023)	unassigned	NODE 25648	NODE 25648
NODE 25836	unassigned	unassigned	Begeman and cols. (2023)	unassigned	NODE 25836	NODE 25836
NODE 27266	unassigned	unassigned	Begeman and cols. (2023)	unassigned	NODE 27266	NODE 27266
NODE 30570	unassigned	unassigned	Begeman and cols. (2023)	unassigned	NODE 30570	NODE 30570
NODE 31914	unassigned	unassigned	Begeman and cols. (2023)	unassigned	NODE 31914	NODE 31914
NODE 33319	unassigned	unassigned	Begeman and cols. (2023)	unassigned	NODE 33319	NODE 33319
NODE 41766	unassigned	unassigned	Begeman and cols. (2023)	unassigned	NODE 41766	NODE 41766
NODE 41856	unassigned	unassigned	Begeman and cols. (2023)	unassigned	NODE 41856	NODE 41856
NODE 57521	unassigned	unassigned	Begeman and cols. (2023)	unassigned	NODE 57521	NODE 57521
NODE 62704	unassigned	unassigned	Begeman and cols. (2023)	unassigned	NODE 62704	NODE 62704
NODE 63927	unassigned	unassigned	Begeman and cols. (2023)	unassigned	NODE 63927	NODE 63927
NODE 67444	unassigned	unassigned	Begeman and cols. (2023)	unassigned	NODE 67444	NODE 67444
NODE 68027	unassigned	unassigned	Begeman and cols. (2023)	unassigned	NODE 68027	NODE 68027
NODE 71991	unassigned	unassigned	Begeman and cols. (2023)	unassigned	NODE 71991	NODE 71991
NODE 10267	unassigned	unassigned	Begeman and cols. (2023)	unassigned	NODE 10267	NODE 10267
NODE 10389	unassigned	unassigned	Begeman and cols. (2023)	unassigned	NODE 10389	NODE 10389
NODE 10708	unassigned	unassigned	Begeman and cols. (2023)	unassigned	NODE 10708	NODE 10708
NODE 1076	unassigned	unassigned	Begeman and cols. (2023)	unassigned	NODE 1076	NODE 1076
NODE 10773	unassigned	unassigned	Begeman and cols. (2023)	unassigned	NODE 10773	NODE 10773
NODE 10968	unassigned	unassigned	Begeman and cols. (2023)	unassigned	NODE 10968	NODE 10968
NODE 1137	unassigned	unassigned	Begeman and cols. (2023)	unassigned	NODE 1137	NODE 1137
NODE 11430	unassigned	unassigned	Begeman and cols. (2023)	unassigned	NODE 11430	NODE 11430
NODE 11698	unassigned	unassigned	Begeman and cols. (2023)	unassigned	NODE 11698	NODE 11698
NODE 12004	unassigned	unassigned	Begeman and cols. (2023)	unassigned	NODE 12004	NODE 12004
NODE 12090	unassigned	unassigned	Begeman and cols. (2023)	unassigned	NODE 12090	NODE 12090
NODE 1217	unassigned	unassigned	Begeman and cols. (2023)	unassigned	NODE 1217	NODE 1217
NODE 1232	unassigned	unassigned	Begeman and cols. (2023)	unassigned	NODE 1232	NODE 1232
NODE 12766	unassigned	unassigned	Begeman and cols. (2023)	unassigned	NODE 12766	NODE 12766
NODE 12775	unassigned	unassigned	Begeman and cols. (2023)	unassigned	NODE 12775	NODE 12775
NODE 12900	unassigned	unassigned	Begeman and cols. (2023)	unassigned	NODE 12900	NODE 12900
NODE 12901	unassigned	unassigned	Begeman and cols. (2023)	unassigned	NODE 12901	NODE 12901
NODE 12921	unassigned	unassigned	Begeman and cols. (2023)	unassigned	NODE 12921	NODE 12921
NODE 1293	unassigned	unassigned	Begeman and cols. (2023)	unassigned	NODE 1293	NODE 1293
NODE 12939	unassigned	unassigned	Begeman and cols. (2023)	unassigned	NODE 12939	NODE 12939
NODE 12993	unassigned	unassigned	Begeman and cols. (2023)	unassigned	NODE 12993	NODE 12993
NODE 13012	unassigned	unassigned	Begeman and cols. (2023)	unassigned	NODE 13012	NODE 13012
NODE 1328	unassigned	unassigned	Begeman and cols. (2023)	unassigned	NODE 1328	NODE 1328
NODE 13310	unassigned	unassigned	Begeman and cols. (2023)	unassigned	NODE 13310	NODE 13310
NODE 13874	unassigned	unassigned	Begeman and cols. (2023)	unassigned	NODE 13874	NODE 13874
NODE 14287	unassigned	unassigned	Begeman and cols. (2023)	unassigned	NODE 14287	NODE 14287
NODE 14661	unassigned	unassigned	Begeman and cols. (2023)	unassigned	NODE 14661	NODE 14661
NODE 14751	unassigned	unassigned	Begeman and cols. (2023)	unassigned	NODE 14751	NODE 14751
NODE 14850	unassigned	unassigned	Begeman and cols. (2023)	unassigned	NODE 14850	NODE 14850
NODE 14900	unassigned	unassigned	Begeman and cols. (2023)	unassigned	NODE 14900	NODE 14900
NODE 1522	unassigned	unassigned	Begeman and cols. (2023)	unassigned	NODE 1522	NODE 1522
NODE 15237	unassigned	unassigned	Begeman and cols. (2023)	unassigned	NODE 15237	NODE 15237
NODE 15375	unassigned	unassigned	Begeman and cols. (2023)	unassigned	NODE 15375	NODE 15375
NODE 15589	unassigned	unassigned	Begeman and cols. (2023)	unassigned	NODE 15589	NODE 15589
NODE 1568	unassigned	unassigned	Begeman and cols. (2023)	unassigned	NODE 1568	NODE 1568
NODE 15723	unassigned	unassigned	Begeman and cols. (2023)	unassigned	NODE 15723	NODE 15723
NODE 1589	unassigned	unassigned	Begeman and cols. (2023)	unassigned	NODE 1589	NODE 1589
NODE 15954	unassigned	unassigned	Begeman and cols. (2023)	unassigned	NODE 15954	NODE 15954
NODE 1599	unassigned	unassigned	Begeman and cols. (2023)	unassigned	NODE 1599	NODE 1599
NODE 16216	unassigned	unassigned	Begeman and cols. (2023)	unassigned	NODE 16216	NODE 16216
NODE 16921	unassigned	unassigned	Begeman and cols. (2023)	unassigned	NODE 16921	NODE 16921
NODE 17028	unassigned	unassigned	Begeman and cols. (2023)	unassigned	NODE 17028	NODE 17028
NODE 17638	unassigned	unassigned	Begeman and cols. (2023)	unassigned	NODE 17638	NODE 17638
NODE 1789	unassigned	unassigned	Begeman and cols. (2023)	unassigned	NODE 1789	NODE 1789
NODE 1813	unassigned	unassigned	Begeman and cols. (2023)	unassigned	NODE 1813	NODE 1813
NODE 18859	unassigned	unassigned	Begeman and cols. (2023)	unassigned	NODE 18859	NODE 18859
NODE 1915	unassigned	unassigned	Begeman and cols. (2023)	unassigned	NODE 1915	NODE 1915
NODE 19215	unassigned	unassigned	Begeman and cols. (2023)	unassigned	NODE 19215	NODE 19215
NODE 1992	unassigned	unassigned	Begeman and cols. (2023)	unassigned	NODE 1992	NODE 1992
NODE 2038	unassigned	unassigned	Begeman and cols. (2023)	unassigned	NODE 2038	NODE 2038
NODE 2047	unassigned	unassigned	Begeman and cols. (2023)	unassigned	NODE 2047	NODE 2047
NODE 2111	unassigned	unassigned	Begeman and cols. (2023)	unassigned	NODE 2111	NODE 2111
NODE 2125	unassigned	unassigned	Begeman and cols. (2023)	unassigned	NODE 2125	NODE 2125
NODE 2131	unassigned	unassigned	Begeman and cols. (2023)	unassigned	NODE 2131	NODE 2131
NODE 21766	unassigned	unassigned	Begeman and cols. (2023)	unassigned	NODE 21766	NODE 21766
NODE 21802	unassigned	unassigned	Begeman and cols. (2023)	unassigned	NODE 21802	NODE 21802
NODE 2234	unassigned	unassigned	Begeman and cols. (2023)	unassigned	NODE 2234	NODE 2234
NODE 22448	unassigned	unassigned	Begeman and cols. (2023)	unassigned	NODE 22448	NODE 22448
NODE 22485	unassigned	unassigned	Begeman and cols. (2023)	unassigned	NODE 22485	NODE 22485
NODE 2268	unassigned	unassigned	Begeman and cols. (2023)	unassigned	NODE 2268	NODE 2268
NODE 2272	unassigned	unassigned	Begeman and cols. (2023)	unassigned	NODE 2272	NODE 2272
NODE 22734	unassigned	unassigned	Begeman and cols. (2023)	unassigned	NODE 22734	NODE 22734
NODE 22816	unassigned	unassigned	Begeman and cols. (2023)	unassigned	NODE 22816	NODE 22816
NODE 2293	unassigned	unassigned	Begeman and cols. (2023)	unassigned	NODE 2293	NODE 2293
NODE 23331	unassigned	unassigned	Begeman and cols. (2023)	unassigned	NODE 23331	NODE 23331
NODE 238	unassigned	unassigned	Begeman and cols. (2023)	unassigned	NODE 238	NODE 238
NODE 23802	unassigned	unassigned	Begeman and cols. (2023)	unassigned	NODE 23802	NODE 23802
NODE 2442	unassigned	unassigned	Begeman and cols. (2023)	unassigned	NODE 2442	NODE 2442
NODE 2485	unassigned	unassigned	Begeman and cols. (2023)	unassigned	NODE 2485	NODE 2485
NODE 25177	unassigned	unassigned	Begeman and cols. (2023)	unassigned	NODE 25177	NODE 25177
NODE 2521	unassigned	unassigned	Begeman and cols. (2023)	unassigned	NODE 2521	NODE 2521
NODE 2538	unassigned	unassigned	Begeman and cols. (2023)	unassigned	NODE 2538	NODE 2538
NODE 25490	unassigned	unassigned	Begeman and cols. (2023)	unassigned	NODE 25490	NODE 25490
NODE 2555	unassigned	unassigned	Begeman and cols. (2023)	unassigned	NODE 2555	NODE 2555
NODE 25636	unassigned	unassigned	Begeman and cols. (2023)	unassigned	NODE 25636	NODE 25636
NODE 2576	unassigned	unassigned	Begeman and cols. (2023)	unassigned	NODE 2576	NODE 2576
NODE 2591	unassigned	unassigned	Begeman and cols. (2023)	unassigned	NODE 2591	NODE 2591
NODE 26150	unassigned	unassigned	Begeman and cols. (2023)	unassigned	NODE 26150	NODE 26150
NODE 26600	unassigned	unassigned	Begeman and cols. (2023)	unassigned	NODE 26600	NODE 26600
NODE 2666	unassigned	unassigned	Begeman and cols. (2023)	unassigned	NODE 2666	NODE 2666
NODE 2681	unassigned	unassigned	Begeman and cols. (2023)	unassigned	NODE 2681	NODE 2681
NODE 2698	unassigned	unassigned	Begeman and cols. (2023)	unassigned	NODE 2698	NODE 2698
NODE 27021	unassigned	unassigned	Begeman and cols. (2023)	unassigned	NODE 27021	NODE 27021
NODE 2749	unassigned	unassigned	Begeman and cols. (2023)	unassigned	NODE 2749	NODE 2749
NODE 27750	unassigned	unassigned	Begeman and cols. (2023)	unassigned	NODE 27750	NODE 27750
NODE 28210	unassigned	unassigned	Begeman and cols. (2023)	unassigned	NODE 28210	NODE 28210
NODE 2832	unassigned	unassigned	Begeman and cols. (2023)	unassigned	NODE 2832	NODE 2832
NODE 28360	unassigned	unassigned	Begeman and cols. (2023)	unassigned	NODE 28360	NODE 28360
NODE 28363	unassigned	unassigned	Begeman and cols. (2023)	unassigned	NODE 28363	NODE 28363
NODE 28469	unassigned	unassigned	Begeman and cols. (2023)	unassigned	NODE 28469	NODE 28469
NODE 2860	unassigned	unassigned	Begeman and cols. (2023)	unassigned	NODE 2860	NODE 2860
NODE 28917	unassigned	unassigned	Begeman and cols. (2023)	unassigned	NODE 28917	NODE 28917
NODE 295	unassigned	unassigned	Begeman and cols. (2023)	unassigned	NODE 295	NODE 295
NODE 2952	unassigned	unassigned	Begeman and cols. (2023)	unassigned	NODE 2952	NODE 2952
NODE 29597	unassigned	unassigned	Begeman and cols. (2023)	unassigned	NODE 29597	NODE 29597
NODE 30148	unassigned	unassigned	Begeman and cols. (2023)	unassigned	NODE 30148	NODE 30148
NODE 30391	unassigned	unassigned	Begeman and cols. (2023)	unassigned	NODE 30391	NODE 30391
NODE 31283	unassigned	unassigned	Begeman and cols. (2023)	unassigned	NODE 31283	NODE 31283
NODE 31587	unassigned	unassigned	Begeman and cols. (2023)	unassigned	NODE 31587	NODE 31587
NODE 3181	unassigned	unassigned	Begeman and cols. (2023)	unassigned	NODE 3181	NODE 3181
NODE 31851	unassigned	unassigned	Begeman and cols. (2023)	unassigned	NODE 31851	NODE 31851
NODE 32152	unassigned	unassigned	Begeman and cols. (2023)	unassigned	NODE 32152	NODE 32152
NODE 33671	unassigned	unassigned	Begeman and cols. (2023)	unassigned	NODE 33671	NODE 33671
NODE 3455	unassigned	unassigned	Begeman and cols. (2023)	unassigned	NODE 3455	NODE 3455
NODE 3478	unassigned	unassigned	Begeman and cols. (2023)	unassigned	NODE 3478	NODE 3478
NODE 35686	unassigned	unassigned	Begeman and cols. (2023)	unassigned	NODE 35686	NODE 35686
NODE 3605	unassigned	unassigned	Begeman and cols. (2023)	unassigned	NODE 3605	NODE 3605
NODE 36056	unassigned	unassigned	Begeman and cols. (2023)	unassigned	NODE 36056	NODE 36056
NODE 36526	unassigned	unassigned	Begeman and cols. (2023)	unassigned	NODE 36526	NODE 36526
NODE 3661	unassigned	unassigned	Begeman and cols. (2023)	unassigned	NODE 3661	NODE 3661
NODE 385	unassigned	unassigned	Begeman and cols. (2023)	unassigned	NODE 385	NODE 385
NODE 39630	unassigned	unassigned	Begeman and cols. (2023)	unassigned	NODE 39630	NODE 39630
NODE 3965	unassigned	unassigned	Begeman and cols. (2023)	unassigned	NODE 3965	NODE 3965
NODE 39807	unassigned	unassigned	Begeman and cols. (2023)	unassigned	NODE 39807	NODE 39807
NODE 40968	unassigned	unassigned	Begeman and cols. (2023)	unassigned	NODE 40968	NODE 40968
NODE 41272	unassigned	unassigned	Begeman and cols. (2023)	unassigned	NODE 41272	NODE 41272
NODE 4256	unassigned	unassigned	Begeman and cols. (2023)	unassigned	NODE 4256	NODE 4256
NODE 44852	unassigned	unassigned	Begeman and cols. (2023)	unassigned	NODE 44852	NODE 44852
NODE 45352	unassigned	unassigned	Begeman and cols. (2023)	unassigned	NODE 45352	NODE 45352
NODE 4779	unassigned	unassigned	Begeman and cols. (2023)	unassigned	NODE 4779	NODE 4779
NODE 4780	unassigned	unassigned	Begeman and cols. (2023)	unassigned	NODE 4780	NODE 4780
NODE 4805	unassigned	unassigned	Begeman and cols. (2023)	unassigned	NODE 4805	NODE 4805
NODE 517	unassigned	unassigned	Begeman and cols. (2023)	unassigned	NODE 517	NODE 517
NODE 552	unassigned	unassigned	Begeman and cols. (2023)	unassigned	NODE 552	NODE 552
NODE 5557	unassigned	unassigned	Begeman and cols. (2023)	unassigned	NODE 5557	NODE 5557
NODE 557	unassigned	unassigned	Begeman and cols. (2023)	unassigned	NODE 557	NODE 557
NODE 5615	unassigned	unassigned	Begeman and cols. (2023)	unassigned	NODE 5615	NODE 5615
NODE 5667	unassigned	unassigned	Begeman and cols. (2023)	unassigned	NODE 5667	NODE 5667
NODE 5748	unassigned	unassigned	Begeman and cols. (2023)	unassigned	NODE 5748	NODE 5748
NODE 5775	unassigned	unassigned	Begeman and cols. (2023)	unassigned	NODE 5775	NODE 5775
NODE 5792	unassigned	unassigned	Begeman and cols. (2023)	unassigned	NODE 5792	NODE 5792
NODE 5807	unassigned	unassigned	Begeman and cols. (2023)	unassigned	NODE 5807	NODE 5807
NODE 5862	unassigned	unassigned	Begeman and cols. (2023)	unassigned	NODE 5862	NODE 5862
NODE 589	unassigned	unassigned	Begeman and cols. (2023)	unassigned	NODE 589	NODE 589
NODE 6177	unassigned	unassigned	Begeman and cols. (2023)	unassigned	NODE 6177	NODE 6177
NODE 6255	unassigned	unassigned	Begeman and cols. (2023)	unassigned	NODE 6255	NODE 6255
NODE 6322	unassigned	unassigned	Begeman and cols. (2023)	unassigned	NODE 6322	NODE 6322
NODE 6346	unassigned	unassigned	Begeman and cols. (2023)	unassigned	NODE 6346	NODE 6346
NODE 692	unassigned	unassigned	Begeman and cols. (2023)	unassigned	NODE 692	NODE 692
NODE 6996	unassigned	unassigned	Begeman and cols. (2023)	unassigned	NODE 6996	NODE 6996
NODE 706	unassigned	unassigned	Begeman and cols. (2023)	unassigned	NODE 706	NODE 706
NODE 714	unassigned	unassigned	Begeman and cols. (2023)	unassigned	NODE 714	NODE 714
NODE 7211	unassigned	unassigned	Begeman and cols. (2023)	unassigned	NODE 7211	NODE 7211
NODE 761	unassigned	unassigned	Begeman and cols. (2023)	unassigned	NODE 761	NODE 761
NODE 765	unassigned	unassigned	Begeman and cols. (2023)	unassigned	NODE 765	NODE 765
NODE 766	unassigned	unassigned	Begeman and cols. (2023)	unassigned	NODE 766	NODE 766
NODE 832	unassigned	unassigned	Begeman and cols. (2023)	unassigned	NODE 832	NODE 832
NODE 8661	unassigned	unassigned	Begeman and cols. (2023)	unassigned	NODE 8661	NODE 8661
NODE 8676	unassigned	unassigned	Begeman and cols. (2023)	unassigned	NODE 8676	NODE 8676
NODE 8913	unassigned	unassigned	Begeman and cols. (2023)	unassigned	NODE 8913	NODE 8913
NODE 9051	unassigned	unassigned	Begeman and cols. (2023)	unassigned	NODE 9051	NODE 9051
NODE 924	unassigned	unassigned	Begeman and cols. (2023)	unassigned	NODE 924	NODE 924
NODE 949	unassigned	unassigned	Begeman and cols. (2023)	unassigned	NODE 949	NODE 949
NODE 960	unassigned	unassigned	Begeman and cols. (2023)	unassigned	NODE 960	NODE 960
NODE 9629	unassigned	unassigned	Begeman and cols. (2023)	unassigned	NODE 9629	NODE 9629
NODE 9727	unassigned	unassigned	Begeman and cols. (2023)	unassigned	NODE 9727	NODE 9727
NODE 15044	unassigned	unassigned	Begeman and cols. (2023)	unassigned	NODE 15044	NODE 15044
NODE 18440	unassigned	unassigned	Begeman and cols. (2023)	unassigned	NODE 18440	NODE 18440
NODE 100	unassigned	unassigned	Begeman and cols. (2023)	unassigned	NODE 100	NODE 100
NODE 103	unassigned	unassigned	Begeman and cols. (2023)	unassigned	NODE 103	NODE 103
NODE 1051	unassigned	unassigned	Begeman and cols. (2023)	unassigned	NODE 1051	NODE 1051
NODE 1107	unassigned	unassigned	Begeman and cols. (2023)	unassigned	NODE 1107	NODE 1107
NODE 1142	unassigned	unassigned	Begeman and cols. (2023)	unassigned	NODE 1142	NODE 1142
NODE 1430	unassigned	unassigned	Begeman and cols. (2023)	unassigned	NODE 1430	NODE 1430
NODE 14828	unassigned	unassigned	Begeman and cols. (2023)	unassigned	NODE 14828	NODE 14828
NODE 1607	unassigned	unassigned	Begeman and cols. (2023)	unassigned	NODE 1607	NODE 1607
NODE 1738	unassigned	unassigned	Begeman and cols. (2023)	unassigned	NODE 1738	NODE 1738
NODE 1935	unassigned	unassigned	Begeman and cols. (2023)	unassigned	NODE 1935	NODE 1935
NODE 22202	unassigned	unassigned	Begeman and cols. (2023)	unassigned	NODE 22202	NODE 22202
NODE 22202	unassigned	unassigned	Begeman and cols. (2023)	unassigned	NODE 22202	NODE 22202
NODE 23451	unassigned	unassigned	Begeman and cols. (2023)	unassigned	NODE 23451	NODE 23451
NODE 24015	unassigned	unassigned	Begeman and cols. (2023)	unassigned	NODE 24015	NODE 24015
NODE 2798	unassigned	unassigned	Begeman and cols. (2023)	unassigned	NODE 2798	NODE 2798
NODE 306	unassigned	unassigned	Begeman and cols. (2023)	unassigned	NODE 306	NODE 306
NODE 341	unassigned	unassigned	Begeman and cols. (2023)	unassigned	NODE 341	NODE 341
NODE 4034	unassigned	unassigned	Begeman and cols. (2023)	unassigned	NODE 4034	NODE 4034
NODE 4215	unassigned	unassigned	Begeman and cols. (2023)	unassigned	NODE 4215	NODE 4215
NODE 493	unassigned	unassigned	Begeman and cols. (2023)	unassigned	NODE 493	NODE 493
NODE 527	unassigned	unassigned	Begeman and cols. (2023)	unassigned	NODE 527	NODE 527
NODE 566	unassigned	unassigned	Begeman and cols. (2023)	unassigned	NODE 566	NODE 566
NODE 5786	unassigned	unassigned	Begeman and cols. (2023)	unassigned	NODE 5786	NODE 5786
NODE 69	unassigned	unassigned	Begeman and cols. (2023)	unassigned	NODE 69	NODE 69
NODE 868	unassigned	unassigned	Begeman and cols. (2023)	unassigned	NODE 868	NODE 868
NODE 905	unassigned	unassigned	Begeman and cols. (2023)	unassigned	NODE 905	NODE 905
NODE 9808	unassigned	unassigned	Begeman and cols. (2023)	unassigned	NODE 9808	NODE 9808
NODE 11399	unassigned	unassigned	Begeman and cols. (2023)	unassigned	NODE 11399	NODE 11399
NODE 11993	unassigned	unassigned	Begeman and cols. (2023)	unassigned	NODE 11993	NODE 11993
NODE 12099	unassigned	unassigned	Begeman and cols. (2023)	unassigned	NODE 12099	NODE 12099
NODE 14058	unassigned	unassigned	Begeman and cols. (2023)	unassigned	NODE 14058	NODE 14058
NODE 14112	unassigned	unassigned	Begeman and cols. (2023)	unassigned	NODE 14112	NODE 14112
NODE 14656	unassigned	unassigned	Begeman and cols. (2023)	unassigned	NODE 14656	NODE 14656
NODE 1479	unassigned	unassigned	Begeman and cols. (2023)	unassigned	NODE 1479	NODE 1479
NODE 16606	unassigned	unassigned	Begeman and cols. (2023)	unassigned	NODE 16606	NODE 16606
NODE 1898	unassigned	unassigned	Begeman and cols. (2023)	unassigned	NODE 1898	NODE 1898
NODE 1917	unassigned	unassigned	Begeman and cols. (2023)	unassigned	NODE 1917	NODE 1917
NODE 1918	unassigned	unassigned	Begeman and cols. (2023)	unassigned	NODE 1918	NODE 1918
NODE 1919	unassigned	unassigned	Begeman and cols. (2023)	unassigned	NODE 1919	NODE 1919
NODE 2057	unassigned	unassigned	Begeman and cols. (2023)	unassigned	NODE 2057	NODE 2057
NODE 2559	unassigned	unassigned	Begeman and cols. (2023)	unassigned	NODE 2559	NODE 2559
NODE 2596	unassigned	unassigned	Begeman and cols. (2023)	unassigned	NODE 2596	NODE 2596
NODE 2778	unassigned	unassigned	Begeman and cols. (2023)	unassigned	NODE 2778	NODE 2778
NODE 2815	unassigned	unassigned	Begeman and cols. (2023)	unassigned	NODE 2815	NODE 2815
NODE 3688	unassigned	unassigned	Begeman and cols. (2023)	unassigned	NODE 3688	NODE 3688
NODE 3955	unassigned	unassigned	Begeman and cols. (2023)	unassigned	NODE 3955	NODE 3955
NODE 5059	unassigned	unassigned	Begeman and cols. (2023)	unassigned	NODE 5059	NODE 5059
NODE 5078	unassigned	unassigned	Begeman and cols. (2023)	unassigned	NODE 5078	NODE 5078
NODE 5271	unassigned	unassigned	Begeman and cols. (2023)	unassigned	NODE 5271	NODE 5271
NODE 5754	unassigned	unassigned	Begeman and cols. (2023)	unassigned	NODE 5754	NODE 5754
NODE 6289	unassigned	unassigned	Begeman and cols. (2023)	unassigned	NODE 6289	NODE 6289
NODE 6523	unassigned	unassigned	Begeman and cols. (2023)	unassigned	NODE 6523	NODE 6523
NODE 6588	unassigned	unassigned	Begeman and cols. (2023)	unassigned	NODE 6588	NODE 6588
NODE 9121	unassigned	unassigned	Begeman and cols. (2023)	unassigned	NODE 9121	NODE 9121
NODE 1062	unassigned	unassigned	Begeman and cols. (2023)	unassigned	NODE 1062	NODE 1062
NODE 10751	unassigned	unassigned	Begeman and cols. (2023)	unassigned	NODE 10751	NODE 10751
NODE 11486	unassigned	unassigned	Begeman and cols. (2023)	unassigned	NODE 11486	NODE 11486
NODE 12025	unassigned	unassigned	Begeman and cols. (2023)	unassigned	NODE 12025	NODE 12025
NODE 15962	unassigned	unassigned	Begeman and cols. (2023)	unassigned	NODE 15962	NODE 15962
NODE 16030	unassigned	unassigned	Begeman and cols. (2023)	unassigned	NODE 16030	NODE 16030
NODE 16221	unassigned	unassigned	Begeman and cols. (2023)	unassigned	NODE 16221	NODE 16221
NODE 16285	unassigned	unassigned	Begeman and cols. (2023)	unassigned	NODE 16285	NODE 16285
NODE 17148	unassigned	unassigned	Begeman and cols. (2023)	unassigned	NODE 17148	NODE 17148
NODE 17185	unassigned	unassigned	Begeman and cols. (2023)	unassigned	NODE 17185	NODE 17185
NODE 17298	unassigned	unassigned	Begeman and cols. (2023)	unassigned	NODE 17298	NODE 17298
NODE 1841	unassigned	unassigned	Begeman and cols. (2023)	unassigned	NODE 1841	NODE 1841
NODE 19018	unassigned	unassigned	Begeman and cols. (2023)	unassigned	NODE 19018	NODE 19018
NODE 19916	unassigned	unassigned	Begeman and cols. (2023)	unassigned	NODE 19916	NODE 19916
NODE 20762	unassigned	unassigned	Begeman and cols. (2023)	unassigned	NODE 20762	NODE 20762
NODE 20917	unassigned	unassigned	Begeman and cols. (2023)	unassigned	NODE 20917	NODE 20917
NODE 21208	unassigned	unassigned	Begeman and cols. (2023)	unassigned	NODE 21208	NODE 21208
NODE 2125	unassigned	unassigned	Begeman and cols. (2023)	unassigned	NODE 2125	NODE 2125
NODE 23336	unassigned	unassigned	Begeman and cols. (2023)	unassigned	NODE 23336	NODE 23336
NODE 23840	unassigned	unassigned	Begeman and cols. (2023)	unassigned	NODE 23840	NODE 23840
NODE 24966	unassigned	unassigned	Begeman and cols. (2023)	unassigned	NODE 24966	NODE 24966
NODE 25081	unassigned	unassigned	Begeman and cols. (2023)	unassigned	NODE 25081	NODE 25081
NODE 25915	unassigned	unassigned	Begeman and cols. (2023)	unassigned	NODE 25915	NODE 25915
NODE 28587	unassigned	unassigned	Begeman and cols. (2023)	unassigned	NODE 28587	NODE 28587
NODE 2945	unassigned	unassigned	Begeman and cols. (2023)	unassigned	NODE 2945	NODE 2945
NODE 3448	unassigned	unassigned	Begeman and cols. (2023)	unassigned	NODE 3448	NODE 3448
NODE 3449	unassigned	unassigned	Begeman and cols. (2023)	unassigned	NODE 3449	NODE 3449
NODE 3450	unassigned	unassigned	Begeman and cols. (2023)	unassigned	NODE 3450	NODE 3450
NODE 3451	unassigned	unassigned	Begeman and cols. (2023)	unassigned	NODE 3451	NODE 3451
NODE 3595	unassigned	unassigned	Begeman and cols. (2023)	unassigned	NODE 3595	NODE 3595
NODE 3596	unassigned	unassigned	Begeman and cols. (2023)	unassigned	NODE 3596	NODE 3596
NODE 5377	unassigned	unassigned	Begeman and cols. (2023)	unassigned	NODE 5377	NODE 5377
NODE 5915	unassigned	unassigned	Begeman and cols. (2023)	unassigned	NODE 5915	NODE 5915
NODE 6174	unassigned	unassigned	Begeman and cols. (2023)	unassigned	NODE 6174	NODE 6174
NODE 8292	unassigned	unassigned	Begeman and cols. (2023)	unassigned	NODE 8292	NODE 8292
NODE 8345	unassigned	unassigned	Begeman and cols. (2023)	unassigned	NODE 8345	NODE 8345
NODE 8614	unassigned	unassigned	Begeman and cols. (2023)	unassigned	NODE 8614	NODE 8614
NODE 10672	unassigned	unassigned	Begeman and cols. (2023)	unassigned	NODE 10672	NODE 10672
NODE 10679	unassigned	unassigned	Begeman and cols. (2023)	unassigned	NODE 10679	NODE 10679
NODE 10745	unassigned	unassigned	Begeman and cols. (2023)	unassigned	NODE 10745	NODE 10745
NODE 11205	unassigned	unassigned	Begeman and cols. (2023)	unassigned	NODE 11205	NODE 11205
NODE 12567	unassigned	unassigned	Begeman and cols. (2023)	unassigned	NODE 12567	NODE 12567
NODE 12641	unassigned	unassigned	Begeman and cols. (2023)	unassigned	NODE 12641	NODE 12641
NODE 12649	unassigned	unassigned	Begeman and cols. (2023)	unassigned	NODE 12649	NODE 12649
NODE 13982	unassigned	unassigned	Begeman and cols. (2023)	unassigned	NODE 13982	NODE 13982
NODE 14054	unassigned	unassigned	Begeman and cols. (2023)	unassigned	NODE 14054	NODE 14054
NODE 14377	unassigned	unassigned	Begeman and cols. (2023)	unassigned	NODE 14377	NODE 14377
NODE 15053	unassigned	unassigned	Begeman and cols. (2023)	unassigned	NODE 15053	NODE 15053
NODE 15471	unassigned	unassigned	Begeman and cols. (2023)	unassigned	NODE 15471	NODE 15471
NODE 15472	unassigned	unassigned	Begeman and cols. (2023)	unassigned	NODE 15472	NODE 15472
NODE 20201	unassigned	unassigned	Begeman and cols. (2023)	unassigned	NODE 20201	NODE 20201
NODE 21206	unassigned	unassigned	Begeman and cols. (2023)	unassigned	NODE 21206	NODE 21206
NODE 25324	unassigned	unassigned	Begeman and cols. (2023)	unassigned	NODE 25324	NODE 25324
NODE 25493	unassigned	unassigned	Begeman and cols. (2023)	unassigned	NODE 25493	NODE 25493
NODE 28059	unassigned	unassigned	Begeman and cols. (2023)	unassigned	NODE 28059	NODE 28059
NODE 34991	unassigned	unassigned	Begeman and cols. (2023)	unassigned	NODE 34991	NODE 34991
NODE 35563	unassigned	unassigned	Begeman and cols. (2023)	unassigned	NODE 35563	NODE 35563
NODE 3986	unassigned	unassigned	Begeman and cols. (2023)	unassigned	NODE 3986	NODE 3986
NODE 4143	unassigned	unassigned	Begeman and cols. (2023)	unassigned	NODE 4143	NODE 4143
NODE 4333	unassigned	unassigned	Begeman and cols. (2023)	unassigned	NODE 4333	NODE 4333
NODE 4346	unassigned	unassigned	Begeman and cols. (2023)	unassigned	NODE 4346	NODE 4346
NODE 4612	unassigned	unassigned	Begeman and cols. (2023)	unassigned	NODE 4612	NODE 4612
NODE 5073	unassigned	unassigned	Begeman and cols. (2023)	unassigned	NODE 5073	NODE 5073
NODE 5288	unassigned	unassigned	Begeman and cols. (2023)	unassigned	NODE 5288	NODE 5288
NODE 5328	unassigned	unassigned	Begeman and cols. (2023)	unassigned	NODE 5328	NODE 5328
NODE 5778	unassigned	unassigned	Begeman and cols. (2023)	unassigned	NODE 5778	NODE 5778
NODE 6099	unassigned	unassigned	Begeman and cols. (2023)	unassigned	NODE 6099	NODE 6099
NODE 6126	unassigned	unassigned	Begeman and cols. (2023)	unassigned	NODE 6126	NODE 6126
NODE 6285	unassigned	unassigned	Begeman and cols. (2023)	unassigned	NODE 6285	NODE 6285
NODE 6521	unassigned	unassigned	Begeman and cols. (2023)	unassigned	NODE 6521	NODE 6521
NODE 6545	unassigned	unassigned	Begeman and cols. (2023)	unassigned	NODE 6545	NODE 6545
NODE 6599	unassigned	unassigned	Begeman and cols. (2023)	unassigned	NODE 6599	NODE 6599
NODE 6700	unassigned	unassigned	Begeman and cols. (2023)	unassigned	NODE 6700	NODE 6700
NODE 6903	unassigned	unassigned	Begeman and cols. (2023)	unassigned	NODE 6903	NODE 6903
NODE 8666	unassigned	unassigned	Begeman and cols. (2023)	unassigned	NODE 8666	NODE 8666
NODE 8676	unassigned	unassigned	Begeman and cols. (2023)	unassigned	NODE 8676	NODE 8676
NODE 9899	unassigned	unassigned	Begeman and cols. (2023)	unassigned	NODE 9899	NODE 9899
NODE 11595	unassigned	unassigned	Begeman and cols. (2023)	unassigned	NODE 11595	NODE 11595
NODE 1310	unassigned	unassigned	Begeman and cols. (2023)	unassigned	NODE 1310	NODE 1310
NODE 15788	unassigned	unassigned	Begeman and cols. (2023)	unassigned	NODE 15788	NODE 15788
NODE 1592	unassigned	unassigned	Begeman and cols. (2023)	unassigned	NODE 1592	NODE 1592
NODE 17316	unassigned	unassigned	Begeman and cols. (2023)	unassigned	NODE 17316	NODE 17316
NODE 20339	unassigned	unassigned	Begeman and cols. (2023)	unassigned	NODE 20339	NODE 20339
NODE 2071	unassigned	unassigned	Begeman and cols. (2023)	unassigned	NODE 2071	NODE 2071
NODE 22543	unassigned	unassigned	Begeman and cols. (2023)	unassigned	NODE 22543	NODE 22543
NODE 23859	unassigned	unassigned	Begeman and cols. (2023)	unassigned	NODE 23859	NODE 23859
NODE 27063	unassigned	unassigned	Begeman and cols. (2023)	unassigned	NODE 27063	NODE 27063
NODE 2898	unassigned	unassigned	Begeman and cols. (2023)	unassigned	NODE 2898	NODE 2898
NODE 29228	unassigned	unassigned	Begeman and cols. (2023)	unassigned	NODE 29228	NODE 29228
NODE 3484	unassigned	unassigned	Begeman and cols. (2023)	unassigned	NODE 3484	NODE 3484
NODE 3933	unassigned	unassigned	Begeman and cols. (2023)	unassigned	NODE 3933	NODE 3933
NODE 5544	unassigned	unassigned	Begeman and cols. (2023)	unassigned	NODE 5544	NODE 5544
NODE 5653	unassigned	unassigned	Begeman and cols. (2023)	unassigned	NODE 5653	NODE 5653
NODE 10879	unassigned	unassigned	Begeman and cols. (2023)	unassigned	NODE 10879	NODE 10879
NODE 10986	unassigned	unassigned	Begeman and cols. (2023)	unassigned	NODE 10986	NODE 10986
NODE 12790	unassigned	unassigned	Begeman and cols. (2023)	unassigned	NODE 12790	NODE 12790
NODE 13300	unassigned	unassigned	Begeman and cols. (2023)	unassigned	NODE 13300	NODE 13300
NODE 13750	unassigned	unassigned	Begeman and cols. (2023)	unassigned	NODE 13750	NODE 13750
NODE 14492	unassigned	unassigned	Begeman and cols. (2023)	unassigned	NODE 14492	NODE 14492
NODE 16226	unassigned	unassigned	Begeman and cols. (2023)	unassigned	NODE 16226	NODE 16226
NODE 17472	unassigned	unassigned	Begeman and cols. (2023)	unassigned	NODE 17472	NODE 17472
NODE 18058	unassigned	unassigned	Begeman and cols. (2023)	unassigned	NODE 18058	NODE 18058
NODE 18059	unassigned	unassigned	Begeman and cols. (2023)	unassigned	NODE 18059	NODE 18059
NODE 21566	unassigned	unassigned	Begeman and cols. (2023)	unassigned	NODE 21566	NODE 21566
NODE 27425	unassigned	unassigned	Begeman and cols. (2023)	unassigned	NODE 27425	NODE 27425
NODE 45558	unassigned	unassigned	Begeman and cols. (2023)	unassigned	NODE 45558	NODE 45558
NODE 54374	unassigned	unassigned	Begeman and cols. (2023)	unassigned	NODE 54374	NODE 54374
NODE 58410	unassigned	unassigned	Begeman and cols. (2023)	unassigned	NODE 58410	NODE 58410
NODE 58880	unassigned	unassigned	Begeman and cols. (2023)	unassigned	NODE 58880	NODE 58880
NODE 61582	unassigned	unassigned	Begeman and cols. (2023)	unassigned	NODE 61582	NODE 61582
NODE 9669	unassigned	unassigned	Begeman and cols. (2023)	unassigned	NODE 9669	NODE 9669
NODE 9901	unassigned	unassigned	Begeman and cols. (2023)	unassigned	NODE 9901	NODE 9901
NODE 9926	unassigned	unassigned	Begeman and cols. (2023)	unassigned	NODE 9926	NODE 9926
NODE 10222	unassigned	unassigned	Begeman and cols. (2023)	unassigned	NODE 10222	NODE 10222
NODE 11230	unassigned	unassigned	Begeman and cols. (2023)	unassigned	NODE 11230	NODE 11230
NODE 11810	unassigned	unassigned	Begeman and cols. (2023)	unassigned	NODE 11810	NODE 11810
NODE 11811	unassigned	unassigned	Begeman and cols. (2023)	unassigned	NODE 11811	NODE 11811
NODE 16769	unassigned	unassigned	Begeman and cols. (2023)	unassigned	NODE 16769	NODE 16769
NODE 17639	unassigned	unassigned	Begeman and cols. (2023)	unassigned	NODE 17639	NODE 17639
NODE 2155	unassigned	unassigned	Begeman and cols. (2023)	unassigned	NODE 2155	NODE 2155
NODE 4002	unassigned	unassigned	Begeman and cols. (2023)	unassigned	NODE 4002	NODE 4002
NODE 4041	unassigned	unassigned	Begeman and cols. (2023)	unassigned	NODE 4041	NODE 4041
NODE 4444	unassigned	unassigned	Begeman and cols. (2023)	unassigned	NODE 4444	NODE 4444
NODE 5106	unassigned	unassigned	Begeman and cols. (2023)	unassigned	NODE 5106	NODE 5106
NODE 8035	unassigned	unassigned	Begeman and cols. (2023)	unassigned	NODE 8035	NODE 8035
NODE 9394	unassigned	unassigned	Begeman and cols. (2023)	unassigned	NODE 9394	NODE 9394
NODE 1009	unassigned	unassigned	Begeman and cols. (2023)	unassigned	NODE 1009	NODE 1009
NODE 1034	unassigned	unassigned	Begeman and cols. (2023)	unassigned	NODE 1034	NODE 1034
NODE 10710	unassigned	unassigned	Begeman and cols. (2023)	unassigned	NODE 10710	NODE 10710
NODE 11304	unassigned	unassigned	Begeman and cols. (2023)	unassigned	NODE 11304	NODE 11304
NODE 1134	unassigned	unassigned	Begeman and cols. (2023)	unassigned	NODE 1134	NODE 1134
NODE 14400	unassigned	unassigned	Begeman and cols. (2023)	unassigned	NODE 14400	NODE 14400
NODE 1598	unassigned	unassigned	Begeman and cols. (2023)	unassigned	NODE 1598	NODE 1598
NODE 1647	unassigned	unassigned	Begeman and cols. (2023)	unassigned	NODE 1647	NODE 1647
NODE 166	unassigned	unassigned	Begeman and cols. (2023)	unassigned	NODE 166	NODE 166
NODE 3064	unassigned	unassigned	Begeman and cols. (2023)	unassigned	NODE 3064	NODE 3064
NODE 3078	unassigned	unassigned	Begeman and cols. (2023)	unassigned	NODE 3078	NODE 3078
NODE 3099	unassigned	unassigned	Begeman and cols. (2023)	unassigned	NODE 3099	NODE 3099
NODE 5541	unassigned	unassigned	Begeman and cols. (2023)	unassigned	NODE 5541	NODE 5541
NODE 581	unassigned	unassigned	Begeman and cols. (2023)	unassigned	NODE 581	NODE 581
NODE 6028	unassigned	unassigned	Begeman and cols. (2023)	unassigned	NODE 6028	NODE 6028
NODE 6880	unassigned	unassigned	Begeman and cols. (2023)	unassigned	NODE 6880	NODE 6880
NODE 7137	unassigned	unassigned	Begeman and cols. (2023)	unassigned	NODE 7137	NODE 7137
NODE 7138	unassigned	unassigned	Begeman and cols. (2023)	unassigned	NODE 7138	NODE 7138
NODE 16	unassigned	unassigned	Begeman and cols. (2023)	unassigned	NODE 16	NODE 16
NODE 1642	unassigned	unassigned	Begeman and cols. (2023)	unassigned	NODE 1642	NODE 1642
NODE 1922	unassigned	unassigned	Begeman and cols. (2023)	unassigned	NODE 1922	NODE 1922
NODE 1980	unassigned	unassigned	Begeman and cols. (2023)	unassigned	NODE 1980	NODE 1980
NODE 20	unassigned	unassigned	Begeman and cols. (2023)	unassigned	NODE 20	NODE 20
NODE 2236	unassigned	unassigned	Begeman and cols. (2023)	unassigned	NODE 2236	NODE 2236
NODE 2318	unassigned	unassigned	Begeman and cols. (2023)	unassigned	NODE 2318	NODE 2318
NODE 26	unassigned	unassigned	Begeman and cols. (2023)	unassigned	NODE 26	NODE 26
NODE 3602	unassigned	unassigned	Begeman and cols. (2023)	unassigned	NODE 3602	NODE 3602
NODE 4459	unassigned	unassigned	Begeman and cols. (2023)	unassigned	NODE 4459	NODE 4459
NODE 4957	unassigned	unassigned	Begeman and cols. (2023)	unassigned	NODE 4957	NODE 4957
NODE 5311	unassigned	unassigned	Begeman and cols. (2023)	unassigned	NODE 5311	NODE 5311
NODE 550	unassigned	unassigned	Begeman and cols. (2023)	unassigned	NODE 550	NODE 550
NODE 5866	unassigned	unassigned	Begeman and cols. (2023)	unassigned	NODE 5866	NODE 5866
NODE 6777	unassigned	unassigned	Begeman and cols. (2023)	unassigned	NODE 6777	NODE 6777
NODE 6989	unassigned	unassigned	Begeman and cols. (2023)	unassigned	NODE 6989	NODE 6989
NODE 7186	unassigned	unassigned	Begeman and cols. (2023)	unassigned	NODE 7186	NODE 7186
NODE 7743	unassigned	unassigned	Begeman and cols. (2023)	unassigned	NODE 7743	NODE 7743
NODE 12646	unassigned	unassigned	Begeman and cols. (2023)	unassigned	NODE 12646	NODE 12646
NODE 15328	unassigned	unassigned	Begeman and cols. (2023)	unassigned	NODE 15328	NODE 15328
NODE 2330	unassigned	unassigned	Begeman and cols. (2023)	unassigned	NODE 2330	NODE 2330
NODE 2924	unassigned	unassigned	Begeman and cols. (2023)	unassigned	NODE 2924	NODE 2924
NODE 42073	unassigned	unassigned	Begeman and cols. (2023)	unassigned	NODE 42073	NODE 42073
NODE 4716	unassigned	unassigned	Begeman and cols. (2023)	unassigned	NODE 4716	NODE 4716
NODE 524	unassigned	unassigned	Begeman and cols. (2023)	unassigned	NODE 524	NODE 524
NODE 819	unassigned	unassigned	Begeman and cols. (2023)	unassigned	NODE 819	NODE 819
NODE 1341	unassigned	unassigned	Begeman and cols. (2023)	unassigned	NODE 1341	NODE 1341
NODE 1704	unassigned	unassigned	Begeman and cols. (2023)	unassigned	NODE 1704	NODE 1704
NODE 178	unassigned	unassigned	Begeman and cols. (2023)	unassigned	NODE 178	NODE 178
NODE 1197	unassigned	unassigned	Begeman and cols. (2023)	unassigned	NODE 1197	NODE 1197
NODE 1536	unassigned	unassigned	Begeman and cols. (2023)	unassigned	NODE 1536	NODE 1536
NODE 2561	unassigned	unassigned	Begeman and cols. (2023)	unassigned	NODE 2561	NODE 2561
NODE 3793	unassigned	unassigned	Begeman and cols. (2023)	unassigned	NODE 3793	NODE 3793
NODE 3759	unassigned	unassigned	Begeman and cols. (2023)	unassigned	NODE 3759	NODE 3759
NODE 8151	unassigned	unassigned	Begeman and cols. (2023)	unassigned	NODE 8151	NODE 8151
NODE 1211	unassigned	unassigned	Begeman and cols. (2023)	unassigned	NODE 1211	NODE 1211
NODE 2110	unassigned	unassigned	Begeman and cols. (2023)	unassigned	NODE 2110	NODE 2110
NODE 4516	unassigned	unassigned	Begeman and cols. (2023)	unassigned	NODE 4516	NODE 4516
NODE 908	unassigned	unassigned	Begeman and cols. (2023)	unassigned	NODE 908	NODE 908
NODE 12651	unassigned	unassigned	Begeman and cols. (2023)	unassigned	NODE 12651	NODE 12651
NODE 16593	unassigned	unassigned	Begeman and cols. (2023)	unassigned	NODE 16593	NODE 16593
NODE 1746	unassigned	unassigned	Begeman and cols. (2023)	unassigned	NODE 1746	NODE 1746
NODE 17531	unassigned	unassigned	Begeman and cols. (2023)	unassigned	NODE 17531	NODE 17531
NODE 22273	unassigned	unassigned	Begeman and cols. (2023)	unassigned	NODE 22273	NODE 22273
NODE 2272	unassigned	unassigned	Begeman and cols. (2023)	unassigned	NODE 2272	NODE 2272
NODE 2439	unassigned	unassigned	Begeman and cols. (2023)	unassigned	NODE 2439	NODE 2439
NODE 2538	unassigned	unassigned	Begeman and cols. (2023)	unassigned	NODE 2538	NODE 2538
NODE 25571	unassigned	unassigned	Begeman and cols. (2023)	unassigned	NODE 25571	NODE 25571
NODE 3054	unassigned	unassigned	Begeman and cols. (2023)	unassigned	NODE 3054	NODE 3054
NODE 31118	unassigned	unassigned	Begeman and cols. (2023)	unassigned	NODE 31118	NODE 31118
NODE 31483	unassigned	unassigned	Begeman and cols. (2023)	unassigned	NODE 31483	NODE 31483
NODE 3393	unassigned	unassigned	Begeman and cols. (2023)	unassigned	NODE 3393	NODE 3393
NODE 3476	unassigned	unassigned	Begeman and cols. (2023)	unassigned	NODE 3476	NODE 3476
NODE 35062	unassigned	unassigned	Begeman and cols. (2023)	unassigned	NODE 35062	NODE 35062
NODE 38115	unassigned	unassigned	Begeman and cols. (2023)	unassigned	NODE 38115	NODE 38115
NODE 41670	unassigned	unassigned	Begeman and cols. (2023)	unassigned	NODE 41670	NODE 41670
NODE 4316	unassigned	unassigned	Begeman and cols. (2023)	unassigned	NODE 4316	NODE 4316
NODE 4380	unassigned	unassigned	Begeman and cols. (2023)	unassigned	NODE 4380	NODE 4380
NODE 4439	unassigned	unassigned	Begeman and cols. (2023)	unassigned	NODE 4439	NODE 4439
NODE 4835	unassigned	unassigned	Begeman and cols. (2023)	unassigned	NODE 4835	NODE 4835
NODE 4877	unassigned	unassigned	Begeman and cols. (2023)	unassigned	NODE 4877	NODE 4877
NODE 4888	unassigned	unassigned	Begeman and cols. (2023)	unassigned	NODE 4888	NODE 4888
NODE 4960	unassigned	unassigned	Begeman and cols. (2023)	unassigned	NODE 4960	NODE 4960
NODE 5049	unassigned	unassigned	Begeman and cols. (2023)	unassigned	NODE 5049	NODE 5049
NODE 5081	unassigned	unassigned	Begeman and cols. (2023)	unassigned	NODE 5081	NODE 5081
NODE 5123	unassigned	unassigned	Begeman and cols. (2023)	unassigned	NODE 5123	NODE 5123
NODE 5130	unassigned	unassigned	Begeman and cols. (2023)	unassigned	NODE 5130	NODE 5130
NODE 5281	unassigned	unassigned	Begeman and cols. (2023)	unassigned	NODE 5281	NODE 5281
NODE 5457	unassigned	unassigned	Begeman and cols. (2023)	unassigned	NODE 5457	NODE 5457
NODE 5764	unassigned	unassigned	Begeman and cols. (2023)	unassigned	NODE 5764	NODE 5764
NODE 6251	unassigned	unassigned	Begeman and cols. (2023)	unassigned	NODE 6251	NODE 6251
NODE 691	unassigned	unassigned	Begeman and cols. (2023)	unassigned	NODE 691	NODE 691
NODE 1297	unassigned	unassigned	Begeman and cols. (2023)	unassigned	NODE 1297	NODE 1297
NODE 1385	unassigned	unassigned	Begeman and cols. (2023)	unassigned	NODE 1385	NODE 1385
NODE 1519	unassigned	unassigned	Begeman and cols. (2023)	unassigned	NODE 1519	NODE 1519
NODE 1582	unassigned	unassigned	Begeman and cols. (2023)	unassigned	NODE 1582	NODE 1582
NODE 1735	unassigned	unassigned	Begeman and cols. (2023)	unassigned	NODE 1735	NODE 1735
NODE 1759	unassigned	unassigned	Begeman and cols. (2023)	unassigned	NODE 1759	NODE 1759
NODE 1829	unassigned	unassigned	Begeman and cols. (2023)	unassigned	NODE 1829	NODE 1829
NODE 2366	unassigned	unassigned	Begeman and cols. (2023)	unassigned	NODE 2366	NODE 2366
NODE 4495	unassigned	unassigned	Begeman and cols. (2023)	unassigned	NODE 4495	NODE 4495
NODE 4853	unassigned	unassigned	Begeman and cols. (2023)	unassigned	NODE 4853	NODE 4853
NODE 6420	unassigned	unassigned	Begeman and cols. (2023)	unassigned	NODE 6420	NODE 6420
NODE 684	unassigned	unassigned	Begeman and cols. (2023)	unassigned	NODE 684	NODE 684
NODE 8587	unassigned	unassigned	Begeman and cols. (2023)	unassigned	NODE 8587	NODE 8587
NODE 9099	unassigned	unassigned	Begeman and cols. (2023)	unassigned	NODE 9099	NODE 9099
NODE 955	unassigned	unassigned	Begeman and cols. (2023)	unassigned	NODE 955	NODE 955
NODE 10452	unassigned	unassigned	Begeman and cols. (2023)	unassigned	NODE 10452	NODE 10452
NODE 10951	unassigned	unassigned	Begeman and cols. (2023)	unassigned	NODE 10951	NODE 10951
NODE 11477	unassigned	unassigned	Begeman and cols. (2023)	unassigned	NODE 11477	NODE 11477
NODE 1235	unassigned	unassigned	Begeman and cols. (2023)	unassigned	NODE 1235	NODE 1235
NODE 12379	unassigned	unassigned	Begeman and cols. (2023)	unassigned	NODE 12379	NODE 12379
NODE 1262	unassigned	unassigned	Begeman and cols. (2023)	unassigned	NODE 1262	NODE 1262
NODE 1293	unassigned	unassigned	Begeman and cols. (2023)	unassigned	NODE 1293	NODE 1293
NODE 1323	unassigned	unassigned	Begeman and cols. (2023)	unassigned	NODE 1323	NODE 1323
NODE 15081	unassigned	unassigned	Begeman and cols. (2023)	unassigned	NODE 15081	NODE 15081
NODE 1566	unassigned	unassigned	Begeman and cols. (2023)	unassigned	NODE 1566	NODE 1566
NODE 1713	unassigned	unassigned	Begeman and cols. (2023)	unassigned	NODE 1713	NODE 1713
NODE 1729	unassigned	unassigned	Begeman and cols. (2023)	unassigned	NODE 1729	NODE 1729
NODE 2255	unassigned	unassigned	Begeman and cols. (2023)	unassigned	NODE 2255	NODE 2255
NODE 3629	unassigned	unassigned	Begeman and cols. (2023)	unassigned	NODE 3629	NODE 3629
NODE 4389	unassigned	unassigned	Begeman and cols. (2023)	unassigned	NODE 4389	NODE 4389
NODE 6368	unassigned	unassigned	Begeman and cols. (2023)	unassigned	NODE 6368	NODE 6368
NODE 9581	unassigned	unassigned	Begeman and cols. (2023)	unassigned	NODE 9581	NODE 9581
NODE 9616	unassigned	unassigned	Begeman and cols. (2023)	unassigned	NODE 9616	NODE 9616
NODE 9963	unassigned	unassigned	Begeman and cols. (2023)	unassigned	NODE 9963	NODE 9963
NODE 111	unassigned	unassigned	Begeman and cols. (2023)	unassigned	NODE 111	NODE 111
NODE 1367	unassigned	unassigned	Begeman and cols. (2023)	unassigned	NODE 1367	NODE 1367
NODE 170	unassigned	unassigned	Begeman and cols. (2023)	unassigned	NODE 170	NODE 170
NODE 235	unassigned	unassigned	Begeman and cols. (2023)	unassigned	NODE 235	NODE 235
NODE 3337	unassigned	unassigned	Begeman and cols. (2023)	unassigned	NODE 3337	NODE 3337
NODE 441	unassigned	unassigned	Begeman and cols. (2023)	unassigned	NODE 441	NODE 441
NODE 558	unassigned	unassigned	Begeman and cols. (2023)	unassigned	NODE 558	NODE 558
NODE 11358	unassigned	unassigned	Begeman and cols. (2023)	unassigned	NODE 11358	NODE 11358
NODE 11824	unassigned	unassigned	Begeman and cols. (2023)	unassigned	NODE 11824	NODE 11824
NODE 12924	unassigned	unassigned	Begeman and cols. (2023)	unassigned	NODE 12924	NODE 12924
NODE 14152	unassigned	unassigned	Begeman and cols. (2023)	unassigned	NODE 14152	NODE 14152
NODE 15913	unassigned	unassigned	Begeman and cols. (2023)	unassigned	NODE 15913	NODE 15913
NODE 16178	unassigned	unassigned	Begeman and cols. (2023)	unassigned	NODE 16178	NODE 16178
NODE 18708	unassigned	unassigned	Begeman and cols. (2023)	unassigned	NODE 18708	NODE 18708
NODE 19107	unassigned	unassigned	Begeman and cols. (2023)	unassigned	NODE 19107	NODE 19107
NODE 19626	unassigned	unassigned	Begeman and cols. (2023)	unassigned	NODE 19626	NODE 19626
NODE 19628	unassigned	unassigned	Begeman and cols. (2023)	unassigned	NODE 19628	NODE 19628
NODE 19648	unassigned	unassigned	Begeman and cols. (2023)	unassigned	NODE 19648	NODE 19648
NODE 19675	unassigned	unassigned	Begeman and cols. (2023)	unassigned	NODE 19675	NODE 19675
NODE 22241	unassigned	unassigned	Begeman and cols. (2023)	unassigned	NODE 22241	NODE 22241
NODE 22242	unassigned	unassigned	Begeman and cols. (2023)	unassigned	NODE 22242	NODE 22242
NODE 22727	unassigned	unassigned	Begeman and cols. (2023)	unassigned	NODE 22727	NODE 22727
NODE 27204	unassigned	unassigned	Begeman and cols. (2023)	unassigned	NODE 27204	NODE 27204
NODE 2820	unassigned	unassigned	Begeman and cols. (2023)	unassigned	NODE 2820	NODE 2820
NODE 28487	unassigned	unassigned	Begeman and cols. (2023)	unassigned	NODE 28487	NODE 28487
NODE 30049	unassigned	unassigned	Begeman and cols. (2023)	unassigned	NODE 30049	NODE 30049
NODE 31447	unassigned	unassigned	Begeman and cols. (2023)	unassigned	NODE 31447	NODE 31447
NODE 32226	unassigned	unassigned	Begeman and cols. (2023)	unassigned	NODE 32226	NODE 32226
NODE 34525	unassigned	unassigned	Begeman and cols. (2023)	unassigned	NODE 34525	NODE 34525
NODE 35390	unassigned	unassigned	Begeman and cols. (2023)	unassigned	NODE 35390	NODE 35390
NODE 36378	unassigned	unassigned	Begeman and cols. (2023)	unassigned	NODE 36378	NODE 36378
NODE 37702	unassigned	unassigned	Begeman and cols. (2023)	unassigned	NODE 37702	NODE 37702
NODE 38454	unassigned	unassigned	Begeman and cols. (2023)	unassigned	NODE 38454	NODE 38454
NODE 38817	unassigned	unassigned	Begeman and cols. (2023)	unassigned	NODE 38817	NODE 38817
NODE 39211	unassigned	unassigned	Begeman and cols. (2023)	unassigned	NODE 39211	NODE 39211
NODE 6520	unassigned	unassigned	Begeman and cols. (2023)	unassigned	NODE 6520	NODE 6520
NODE 7280	unassigned	unassigned	Begeman and cols. (2023)	unassigned	NODE 7280	NODE 7280
NODE 7656	unassigned	unassigned	Begeman and cols. (2023)	unassigned	NODE 7656	NODE 7656
NODE 8445	unassigned	unassigned	Begeman and cols. (2023)	unassigned	NODE 8445	NODE 8445
NODE 8699	unassigned	unassigned	Begeman and cols. (2023)	unassigned	NODE 8699	NODE 8699
NODE 8991	unassigned	unassigned	Begeman and cols. (2023)	unassigned	NODE 8991	NODE 8991
NODE 9006	unassigned	unassigned	Begeman and cols. (2023)	unassigned	NODE 9006	NODE 9006
NODE 9224	unassigned	unassigned	Begeman and cols. (2023)	unassigned	NODE 9224	NODE 9224
NODE 9351	unassigned	unassigned	Begeman and cols. (2023)	unassigned	NODE 9351	NODE 9351
NODE 9945	unassigned	unassigned	Begeman and cols. (2023)	unassigned	NODE 9945	NODE 9945
NODE 9947	unassigned	unassigned	Begeman and cols. (2023)	unassigned	NODE 9947	NODE 9947
NODE 29542	unassigned	unassigned	Begeman and cols. (2023)	unassigned	NODE 29542	NODE 29542
NODE 17189	unassigned	unassigned	Begeman and cols. (2023)	unassigned	NODE 17189	NODE 17189
NODE 23840	unassigned	unassigned	Begeman and cols. (2023)	unassigned	NODE 23840	NODE 23840
NODE 33871	unassigned	unassigned	Begeman and cols. (2023)	unassigned	NODE 33871	NODE 33871
NODE 36204	unassigned	unassigned	Begeman and cols. (2023)	unassigned	NODE 36204	NODE 36204
NODE 38595	unassigned	unassigned	Begeman and cols. (2023)	unassigned	NODE 38595	NODE 38595
NODE 6215	unassigned	unassigned	Begeman and cols. (2023)	unassigned	NODE 6215	NODE 6215
NODE 6216	unassigned	unassigned	Begeman and cols. (2023)	unassigned	NODE 6216	NODE 6216
NODE 6495	unassigned	unassigned	Begeman and cols. (2023)	unassigned	NODE 6495	NODE 6495
NODE 6691	unassigned	unassigned	Begeman and cols. (2023)	unassigned	NODE 6691	NODE 6691
NODE 7389	unassigned	unassigned	Begeman and cols. (2023)	unassigned	NODE 7389	NODE 7389
NODE 17294	unassigned	unassigned	Begeman and cols. (2023)	unassigned	NODE 17294	NODE 17294
NODE 20788	unassigned	unassigned	Begeman and cols. (2023)	unassigned	NODE 20788	NODE 20788
NODE 30555	unassigned	unassigned	Begeman and cols. (2023)	unassigned	NODE 30555	NODE 30555
NODE 4135	unassigned	unassigned	Begeman and cols. (2023)	unassigned	NODE 4135	NODE 4135
NODE 4692	unassigned	unassigned	Begeman and cols. (2023)	unassigned	NODE 4692	NODE 4692
NODE 5187	unassigned	unassigned	Begeman and cols. (2023)	unassigned	NODE 5187	NODE 5187
NODE 6662	unassigned	unassigned	Begeman and cols. (2023)	unassigned	NODE 6662	NODE 6662
NODE 1232	unassigned	unassigned	Begeman and cols. (2023)	unassigned	NODE 1232	NODE 1232
NODE 1250	unassigned	unassigned	Begeman and cols. (2023)	unassigned	NODE 1250	NODE 1250
NODE 142	unassigned	unassigned	Begeman and cols. (2023)	unassigned	NODE 142	NODE 142
NODE 1999	unassigned	unassigned	Begeman and cols. (2023)	unassigned	NODE 1999	NODE 1999
NODE 256	unassigned	unassigned	Begeman and cols. (2023)	unassigned	NODE 256	NODE 256
NODE 612	unassigned	unassigned	Begeman and cols. (2023)	unassigned	NODE 612	NODE 612
NODE 678	unassigned	unassigned	Begeman and cols. (2023)	unassigned	NODE 678	NODE 678
NODE 718	unassigned	unassigned	Begeman and cols. (2023)	unassigned	NODE 718	NODE 718
NODE 886	unassigned	unassigned	Begeman and cols. (2023)	unassigned	NODE 886	NODE 886
NODE 961	unassigned	unassigned	Begeman and cols. (2023)	unassigned	NODE 961	NODE 961
NODE 1011	unassigned	unassigned	Begeman and cols. (2023)	unassigned	NODE 1011	NODE 1011
NODE 1901	unassigned	unassigned	Begeman and cols. (2023)	unassigned	NODE 1901	NODE 1901
NODE 1921	unassigned	unassigned	Begeman and cols. (2023)	unassigned	NODE 1921	NODE 1921
NODE 2875	unassigned	unassigned	Begeman and cols. (2023)	unassigned	NODE 2875	NODE 2875
NODE 3987	unassigned	unassigned	Begeman and cols. (2023)	unassigned	NODE 3987	NODE 3987
NODE 4182	unassigned	unassigned	Begeman and cols. (2023)	unassigned	NODE 4182	NODE 4182
NODE 724	unassigned	unassigned	Begeman and cols. (2023)	unassigned	NODE 724	NODE 724
NODE-10058-length-4452-cov-5	unassigned	unassigned	Begeman and cols. (2023)	unassigned	NODE-10058-length-4452-cov-5	NODE-10058-length-4452-cov-5
NODE-109-length-2592-cov-221	unassigned	unassigned	Begeman and cols. (2023)	unassigned	NODE-109-length-2592-cov-221	NODE-109-length-2592-cov-221
NODE-15741-length-1024-cov-1	unassigned	unassigned	Begeman and cols. (2023)	unassigned	NODE-15741-length-1024-cov-1	NODE-15741-length-1024-cov-1
NODE-16573-length-943-cov-1	unassigned	unassigned	Begeman and cols. (2023)	unassigned	NODE-16573-length-943-cov-1	NODE-16573-length-943-cov-1
NODE-19014-length-2436-cov-4398	unassigned	unassigned	Begeman and cols. (2023)	unassigned	NODE-19014-length-2436-cov-4398	NODE-19014-length-2436-cov-4398
NODE-19492-length-2392-cov-37967	unassigned	unassigned	Begeman and cols. (2023)	unassigned	NODE-19492-length-2392-cov-37967	NODE-19492-length-2392-cov-37967
NODE-19702-length-2371-cov-48352	unassigned	unassigned	Begeman and cols. (2023)	unassigned	NODE-19702-length-2371-cov-48352	NODE-19702-length-2371-cov-48352
NODE-19762-length-3255-cov-17	unassigned	unassigned	Begeman and cols. (2023)	unassigned	NODE-19762-length-3255-cov-17	NODE-19762-length-3255-cov-17
NODE-19829-length-2360-cov-12856	unassigned	unassigned	Begeman and cols. (2023)	unassigned	NODE-19829-length-2360-cov-12856	NODE-19829-length-2360-cov-12856
NODE-20317-length-2322-cov-43578	unassigned	unassigned	Begeman and cols. (2023)	unassigned	NODE-20317-length-2322-cov-43578	NODE-20317-length-2322-cov-43578
NODE-21866-length-3084-cov-8	unassigned	unassigned	Begeman and cols. (2023)	unassigned	NODE-21866-length-3084-cov-8	NODE-21866-length-3084-cov-8
NODE-23047-length-2997-cov-8	unassigned	unassigned	Begeman and cols. (2023)	unassigned	NODE-23047-length-2997-cov-8	NODE-23047-length-2997-cov-8
NODE-23199-length-2987-cov-6	unassigned	unassigned	Begeman and cols. (2023)	unassigned	NODE-23199-length-2987-cov-6	NODE-23199-length-2987-cov-6
NODE-248-length-1997-cov-1034	unassigned	unassigned	Begeman and cols. (2023)	unassigned	NODE-248-length-1997-cov-1034	NODE-248-length-1997-cov-1034
NODE-26975-length-2649-cov-12	unassigned	unassigned	Begeman and cols. (2023)	unassigned	NODE-26975-length-2649-cov-12	NODE-26975-length-2649-cov-12
NODE-27966-length-1800-cov-11117	unassigned	unassigned	Begeman and cols. (2023)	unassigned	NODE-27966-length-1800-cov-11117	NODE-27966-length-1800-cov-11117
NODE-28693-length-2664-cov-9	unassigned	unassigned	Begeman and cols. (2023)	unassigned	NODE-28693-length-2664-cov-9	NODE-28693-length-2664-cov-9
NODE-30256-length-2443-cov-58	unassigned	unassigned	Begeman and cols. (2023)	unassigned	NODE-30256-length-2443-cov-58	NODE-30256-length-2443-cov-58
NODE-31689-length-2512-cov-3079	unassigned	unassigned	Begeman and cols. (2023)	unassigned	NODE-31689-length-2512-cov-3079	NODE-31689-length-2512-cov-3079
NODE-31767-length-2510-cov-2	unassigned	unassigned	Begeman and cols. (2023)	unassigned	NODE-31767-length-2510-cov-2	NODE-31767-length-2510-cov-2
NODE-32172-length-2491-cov-39	unassigned	unassigned	Begeman and cols. (2023)	unassigned	NODE-32172-length-2491-cov-39	NODE-32172-length-2491-cov-39
NODE-33037-length-2450-cov-55	unassigned	unassigned	Begeman and cols. (2023)	unassigned	NODE-33037-length-2450-cov-55	NODE-33037-length-2450-cov-55
NODE-33049-length-2450-cov-21	unassigned	unassigned	Begeman and cols. (2023)	unassigned	NODE-33049-length-2450-cov-21	NODE-33049-length-2450-cov-21
NODE-33347-length-2436-cov-9046	unassigned	unassigned	Begeman and cols. (2023)	unassigned	NODE-33347-length-2436-cov-9046	NODE-33347-length-2436-cov-9046
NODE-33966-length-2243-cov-25	unassigned	unassigned	Begeman and cols. (2023)	unassigned	NODE-33966-length-2243-cov-25	NODE-33966-length-2243-cov-25
NODE-34640-length-2379-cov-14	unassigned	unassigned	Begeman and cols. (2023)	unassigned	NODE-34640-length-2379-cov-14	NODE-34640-length-2379-cov-14
NODE-35579-length-2340-cov-5	unassigned	unassigned	Begeman and cols. (2023)	unassigned	NODE-35579-length-2340-cov-5	NODE-35579-length-2340-cov-5
NODE-35585-length-2339-cov-38639	unassigned	unassigned	Begeman and cols. (2023)	unassigned	NODE-35585-length-2339-cov-38639	NODE-35585-length-2339-cov-38639
NODE-35586-length-2339-cov-10458	unassigned	unassigned	Begeman and cols. (2023)	unassigned	NODE-35586-length-2339-cov-10458	NODE-35586-length-2339-cov-10458
NODE-35867-length-2329-cov-7	unassigned	unassigned	Begeman and cols. (2023)	unassigned	NODE-35867-length-2329-cov-7	NODE-35867-length-2329-cov-7
NODE-36505-length-1394-cov-1	unassigned	unassigned	Begeman and cols. (2023)	unassigned	NODE-36505-length-1394-cov-1	NODE-36505-length-1394-cov-1
NODE-3762-length-4228-cov-315	unassigned	unassigned	Begeman and cols. (2023)	unassigned	NODE-3762-length-4228-cov-315	NODE-3762-length-4228-cov-315
NODE-38292-length-2235-cov-30	unassigned	unassigned	Begeman and cols. (2023)	unassigned	NODE-38292-length-2235-cov-30	NODE-38292-length-2235-cov-30
NODE-45701-length-1986-cov-13	unassigned	unassigned	Begeman and cols. (2023)	unassigned	NODE-45701-length-1986-cov-13	NODE-45701-length-1986-cov-13
NODE-47851-length-1922-cov-2	unassigned	unassigned	Begeman and cols. (2023)	unassigned	NODE-47851-length-1922-cov-2	NODE-47851-length-1922-cov-2
NODE-48247-length-1910-cov-2	unassigned	unassigned	Begeman and cols. (2023)	unassigned	NODE-48247-length-1910-cov-2	NODE-48247-length-1910-cov-2
NODE-52867-length-1792-cov-2	unassigned	unassigned	Begeman and cols. (2023)	unassigned	NODE-52867-length-1792-cov-2	NODE-52867-length-1792-cov-2
NODE-58712-length-1652-cov-2	unassigned	unassigned	Begeman and cols. (2023)	unassigned	NODE-58712-length-1652-cov-2	NODE-58712-length-1652-cov-2
NODE-60228-length-1619-cov-1	unassigned	unassigned	Begeman and cols. (2023)	unassigned	NODE-60228-length-1619-cov-1	NODE-60228-length-1619-cov-1
NODE-62477-length-1572-cov-1	unassigned	unassigned	Begeman and cols. (2023)	unassigned	NODE-62477-length-1572-cov-1	NODE-62477-length-1572-cov-1
NODE-63235-length-1556-cov-2	unassigned	unassigned	Begeman and cols. (2023)	unassigned	NODE-63235-length-1556-cov-2	NODE-63235-length-1556-cov-2
NODE-70283-length-1422-cov-7	unassigned	unassigned	Begeman and cols. (2023)	unassigned	NODE-70283-length-1422-cov-7	NODE-70283-length-1422-cov-7
NODE-70804-length-1413-cov-8	unassigned	unassigned	Begeman and cols. (2023)	unassigned	NODE-70804-length-1413-cov-8	NODE-70804-length-1413-cov-8
NODE-71915-length-1393-cov-4	unassigned	unassigned	Begeman and cols. (2023)	unassigned	NODE-71915-length-1393-cov-4	NODE-71915-length-1393-cov-4
NODE-74779-length-1345-cov-3	unassigned	unassigned	Begeman and cols. (2023)	unassigned	NODE-74779-length-1345-cov-3	NODE-74779-length-1345-cov-3
NODE-77688-length-1300-cov-1	unassigned	unassigned	Begeman and cols. (2023)	unassigned	NODE-77688-length-1300-cov-1	NODE-77688-length-1300-cov-1
NODE-83262-length-1217-cov-1	unassigned	unassigned	Begeman and cols. (2023)	unassigned	NODE-83262-length-1217-cov-1	NODE-83262-length-1217-cov-1
NODE-919-length-1264-cov-367	unassigned	unassigned	Begeman and cols. (2023)	unassigned	NODE-919-length-1264-cov-367	NODE-919-length-1264-cov-367
NODE-93946-length-1080-cov-2	unassigned	unassigned	Begeman and cols. (2023)	unassigned	NODE-93946-length-1080-cov-2	NODE-93946-length-1080-cov-2
NODE-94776-length-1070-cov-1	unassigned	unassigned	Begeman and cols. (2023)	unassigned	NODE-94776-length-1070-cov-1	NODE-94776-length-1070-cov-1
NODE-10453-length-3698-cov-4573	unassigned	unassigned	Begeman and cols. (2023)	unassigned	NODE-10453-length-3698-cov-4573	NODE-10453-length-3698-cov-4573
NODE-10542-length-1069-cov-4	unassigned	unassigned	Begeman and cols. (2023)	unassigned	NODE-10542-length-1069-cov-4	NODE-10542-length-1069-cov-4
NODE-1215-length-2804-cov-8	unassigned	unassigned	Begeman and cols. (2023)	unassigned	NODE-1215-length-2804-cov-8	NODE-1215-length-2804-cov-8
NODE-12335-length-2638-cov-3567	unassigned	unassigned	Begeman and cols. (2023)	unassigned	NODE-12335-length-2638-cov-3567	NODE-12335-length-2638-cov-3567
NODE-12956-length-970-cov-2	unassigned	unassigned	Begeman and cols. (2023)	unassigned	NODE-12956-length-970-cov-2	NODE-12956-length-970-cov-2
NODE-14106-length-2443-cov-43	unassigned	unassigned	Begeman and cols. (2023)	unassigned	NODE-14106-length-2443-cov-43	NODE-14106-length-2443-cov-43
NODE-14411-length-2796-cov-55	unassigned	unassigned	Begeman and cols. (2023)	unassigned	NODE-14411-length-2796-cov-55	NODE-14411-length-2796-cov-55
NODE-14981-length-3144-cov-7	unassigned	unassigned	Begeman and cols. (2023)	unassigned	NODE-14981-length-3144-cov-7	NODE-14981-length-3144-cov-7
NODE-15330-length-3175-cov-10	unassigned	unassigned	Begeman and cols. (2023)	unassigned	NODE-15330-length-3175-cov-10	NODE-15330-length-3175-cov-10
NODE-15628-length-3074-cov-20	unassigned	unassigned	Begeman and cols. (2023)	unassigned	NODE-15628-length-3074-cov-20	NODE-15628-length-3074-cov-20
NODE-15693-length-3137-cov-8	unassigned	unassigned	Begeman and cols. (2023)	unassigned	NODE-15693-length-3137-cov-8	NODE-15693-length-3137-cov-8
NODE-15745-length-3063-cov-14	unassigned	unassigned	Begeman and cols. (2023)	unassigned	NODE-15745-length-3063-cov-14	NODE-15745-length-3063-cov-14
NODE-1584-length-2572-cov-6	unassigned	unassigned	Begeman and cols. (2023)	unassigned	NODE-1584-length-2572-cov-6	NODE-1584-length-2572-cov-6
NODE-1628-length-2555-cov-10	unassigned	unassigned	Begeman and cols. (2023)	unassigned	NODE-1628-length-2555-cov-10	NODE-1628-length-2555-cov-10
NODE-16371-length-3074-cov-9	unassigned	unassigned	Begeman and cols. (2023)	unassigned	NODE-16371-length-3074-cov-9	NODE-16371-length-3074-cov-9
NODE-16831-length-2185-cov-3	unassigned	unassigned	Begeman and cols. (2023)	unassigned	NODE-16831-length-2185-cov-3	NODE-16831-length-2185-cov-3
NODE-17023-length-1464-cov-58	unassigned	unassigned	Begeman and cols. (2023)	unassigned	NODE-17023-length-1464-cov-58	NODE-17023-length-1464-cov-58
NODE-17190-length-2927-cov-13	unassigned	unassigned	Begeman and cols. (2023)	unassigned	NODE-17190-length-2927-cov-13	NODE-17190-length-2927-cov-13
NODE-17418-length-2903-cov-10	unassigned	unassigned	Begeman and cols. (2023)	unassigned	NODE-17418-length-2903-cov-10	NODE-17418-length-2903-cov-10
NODE-17501-length-2980-cov-17	unassigned	unassigned	Begeman and cols. (2023)	unassigned	NODE-17501-length-2980-cov-17	NODE-17501-length-2980-cov-17
NODE-1768-length-2487-cov-5	unassigned	unassigned	Begeman and cols. (2023)	unassigned	NODE-1768-length-2487-cov-5	NODE-1768-length-2487-cov-5
NODE-18116-length-2326-cov-8340	unassigned	unassigned	Begeman and cols. (2023)	unassigned	NODE-18116-length-2326-cov-8340	NODE-18116-length-2326-cov-8340
NODE-18297-length-2909-cov-8	unassigned	unassigned	Begeman and cols. (2023)	unassigned	NODE-18297-length-2909-cov-8	NODE-18297-length-2909-cov-8
NODE-1873-length-2437-cov-4	unassigned	unassigned	Begeman and cols. (2023)	unassigned	NODE-1873-length-2437-cov-4	NODE-1873-length-2437-cov-4
NODE-18979-length-2020-cov-5	unassigned	unassigned	Begeman and cols. (2023)	unassigned	NODE-18979-length-2020-cov-5	NODE-18979-length-2020-cov-5
NODE-19035-length-2768-cov-6	unassigned	unassigned	Begeman and cols. (2023)	unassigned	NODE-19035-length-2768-cov-6	NODE-19035-length-2768-cov-6
NODE-1988-length-2840-cov-299	unassigned	unassigned	Begeman and cols. (2023)	unassigned	NODE-1988-length-2840-cov-299	NODE-1988-length-2840-cov-299
NODE-2010-length-2842-cov-207	unassigned	unassigned	Begeman and cols. (2023)	unassigned	NODE-2010-length-2842-cov-207	NODE-2010-length-2842-cov-207
NODE-20132-length-2683-cov-2	unassigned	unassigned	Begeman and cols. (2023)	unassigned	NODE-20132-length-2683-cov-2	NODE-20132-length-2683-cov-2
NODE-20408-length-2080-cov-7940	unassigned	unassigned	Begeman and cols. (2023)	unassigned	NODE-20408-length-2080-cov-7940	NODE-20408-length-2080-cov-7940
NODE-2055-length-2362-cov-12	unassigned	unassigned	Begeman and cols. (2023)	unassigned	NODE-2055-length-2362-cov-12	NODE-2055-length-2362-cov-12
NODE-2070-length-3216-cov-4385	unassigned	unassigned	Begeman and cols. (2023)	unassigned	NODE-2070-length-3216-cov-4385	NODE-2070-length-3216-cov-4385
NODE-2151-length-4116-cov-978	unassigned	unassigned	Begeman and cols. (2023)	unassigned	NODE-2151-length-4116-cov-978	NODE-2151-length-4116-cov-978
NODE-21597-length-2661-cov-9	unassigned	unassigned	Begeman and cols. (2023)	unassigned	NODE-21597-length-2661-cov-9	NODE-21597-length-2661-cov-9
NODE-24181-length-1155-cov-46	unassigned	unassigned	Begeman and cols. (2023)	unassigned	NODE-24181-length-1155-cov-46	NODE-24181-length-1155-cov-46
NODE-2459-length-3519-cov-11	unassigned	unassigned	Begeman and cols. (2023)	unassigned	NODE-2459-length-3519-cov-11	NODE-2459-length-3519-cov-11
NODE-25750-length-1645-cov-7171	unassigned	unassigned	Begeman and cols. (2023)	unassigned	NODE-25750-length-1645-cov-7171	NODE-25750-length-1645-cov-7171
NODE-26821-length-1572-cov-6940	unassigned	unassigned	Begeman and cols. (2023)	unassigned	NODE-26821-length-1572-cov-6940	NODE-26821-length-1572-cov-6940
NODE-28115-length-1498-cov-8015	unassigned	unassigned	Begeman and cols. (2023)	unassigned	NODE-28115-length-1498-cov-8015	NODE-28115-length-1498-cov-8015
NODE-28454-length-1481-cov-9086	unassigned	unassigned	Begeman and cols. (2023)	unassigned	NODE-28454-length-1481-cov-9086	NODE-28454-length-1481-cov-9086
NODE-28455-length-1481-cov-8571	unassigned	unassigned	Begeman and cols. (2023)	unassigned	NODE-28455-length-1481-cov-8571	NODE-28455-length-1481-cov-8571
NODE-28759-length-1464-cov-9037	unassigned	unassigned	Begeman and cols. (2023)	unassigned	NODE-28759-length-1464-cov-9037	NODE-28759-length-1464-cov-9037
NODE-28900-length-2170-cov-6	unassigned	unassigned	Begeman and cols. (2023)	unassigned	NODE-28900-length-2170-cov-6	NODE-28900-length-2170-cov-6
NODE-29137-length-2626-cov-3	unassigned	unassigned	Begeman and cols. (2023)	unassigned	NODE-29137-length-2626-cov-3	NODE-29137-length-2626-cov-3
NODE-29188-length-1438-cov-8801	unassigned	unassigned	Begeman and cols. (2023)	unassigned	NODE-29188-length-1438-cov-8801	NODE-29188-length-1438-cov-8801
NODE-29189-length-1438-cov-8798	unassigned	unassigned	Begeman and cols. (2023)	unassigned	NODE-29189-length-1438-cov-8798	NODE-29189-length-1438-cov-8798
NODE-29190-length-1438-cov-8651	unassigned	unassigned	Begeman and cols. (2023)	unassigned	NODE-29190-length-1438-cov-8651	NODE-29190-length-1438-cov-8651
NODE-29191-length-1438-cov-8388	unassigned	unassigned	Begeman and cols. (2023)	unassigned	NODE-29191-length-1438-cov-8388	NODE-29191-length-1438-cov-8388
NODE-29628-length-2596-cov-15	unassigned	unassigned	Begeman and cols. (2023)	unassigned	NODE-29628-length-2596-cov-15	NODE-29628-length-2596-cov-15
NODE-30978-length-1356-cov-9578	unassigned	unassigned	Begeman and cols. (2023)	unassigned	NODE-30978-length-1356-cov-9578	NODE-30978-length-1356-cov-9578
NODE-3111-length-3546-cov-417	unassigned	unassigned	Begeman and cols. (2023)	unassigned	NODE-3111-length-3546-cov-417	NODE-3111-length-3546-cov-417
NODE-3112-length-3546-cov-367	unassigned	unassigned	Begeman and cols. (2023)	unassigned	NODE-3112-length-3546-cov-367	NODE-3112-length-3546-cov-367
NODE-31275-length-1342-cov-10334	unassigned	unassigned	Begeman and cols. (2023)	unassigned	NODE-31275-length-1342-cov-10334	NODE-31275-length-1342-cov-10334
NODE-31276-length-1342-cov-9417	unassigned	unassigned	Begeman and cols. (2023)	unassigned	NODE-31276-length-1342-cov-9417	NODE-31276-length-1342-cov-9417
NODE-31277-length-1342-cov-7920	unassigned	unassigned	Begeman and cols. (2023)	unassigned	NODE-31277-length-1342-cov-7920	NODE-31277-length-1342-cov-7920
NODE-31621-length-1327-cov-9212	unassigned	unassigned	Begeman and cols. (2023)	unassigned	NODE-31621-length-1327-cov-9212	NODE-31621-length-1327-cov-9212
NODE-32260-length-2022-cov-8	unassigned	unassigned	Begeman and cols. (2023)	unassigned	NODE-32260-length-2022-cov-8	NODE-32260-length-2022-cov-8
NODE-33500-length-1247-cov-7029	unassigned	unassigned	Begeman and cols. (2023)	unassigned	NODE-33500-length-1247-cov-7029	NODE-33500-length-1247-cov-7029
NODE-34618-length-2314-cov-2301	unassigned	unassigned	Begeman and cols. (2023)	unassigned	NODE-34618-length-2314-cov-2301	NODE-34618-length-2314-cov-2301
NODE-35244-length-1962-cov-4	unassigned	unassigned	Begeman and cols. (2023)	unassigned	NODE-35244-length-1962-cov-4	NODE-35244-length-1962-cov-4
NODE-35372-length-1176-cov-10632	unassigned	unassigned	Begeman and cols. (2023)	unassigned	NODE-35372-length-1176-cov-10632	NODE-35372-length-1176-cov-10632
NODE-35373-length-1176-cov-10304	unassigned	unassigned	Begeman and cols. (2023)	unassigned	NODE-35373-length-1176-cov-10304	NODE-35373-length-1176-cov-10304
NODE-35374-length-1176-cov-9791	unassigned	unassigned	Begeman and cols. (2023)	unassigned	NODE-35374-length-1176-cov-9791	NODE-35374-length-1176-cov-9791
NODE-35523-length-1171-cov-10596	unassigned	unassigned	Begeman and cols. (2023)	unassigned	NODE-35523-length-1171-cov-10596	NODE-35523-length-1171-cov-10596
NODE-35524-length-1171-cov-9243	unassigned	unassigned	Begeman and cols. (2023)	unassigned	NODE-35524-length-1171-cov-9243	NODE-35524-length-1171-cov-9243
NODE-35525-length-1171-cov-9238	unassigned	unassigned	Begeman and cols. (2023)	unassigned	NODE-35525-length-1171-cov-9238	NODE-35525-length-1171-cov-9238
NODE-35526-length-1171-cov-9200	unassigned	unassigned	Begeman and cols. (2023)	unassigned	NODE-35526-length-1171-cov-9200	NODE-35526-length-1171-cov-9200
NODE-35527-length-1171-cov-9196	unassigned	unassigned	Begeman and cols. (2023)	unassigned	NODE-35527-length-1171-cov-9196	NODE-35527-length-1171-cov-9196
NODE-35785-length-1162-cov-9540	unassigned	unassigned	Begeman and cols. (2023)	unassigned	NODE-35785-length-1162-cov-9540	NODE-35785-length-1162-cov-9540
NODE-36153-length-1149-cov-10423	unassigned	unassigned	Begeman and cols. (2023)	unassigned	NODE-36153-length-1149-cov-10423	NODE-36153-length-1149-cov-10423
NODE-37537-length-1102-cov-10711	unassigned	unassigned	Begeman and cols. (2023)	unassigned	NODE-37537-length-1102-cov-10711	NODE-37537-length-1102-cov-10711
NODE-37538-length-1102-cov-10032	unassigned	unassigned	Begeman and cols. (2023)	unassigned	NODE-37538-length-1102-cov-10032	NODE-37538-length-1102-cov-10032
NODE-38330-length-1848-cov-5	unassigned	unassigned	Begeman and cols. (2023)	unassigned	NODE-38330-length-1848-cov-5	NODE-38330-length-1848-cov-5
NODE-38736-length-1834-cov-5	unassigned	unassigned	Begeman and cols. (2023)	unassigned	NODE-38736-length-1834-cov-5	NODE-38736-length-1834-cov-5
NODE-3897-length-2845-cov-382	unassigned	unassigned	Begeman and cols. (2023)	unassigned	NODE-3897-length-2845-cov-382	NODE-3897-length-2845-cov-382
NODE-39103-length-1054-cov-10462	unassigned	unassigned	Begeman and cols. (2023)	unassigned	NODE-39103-length-1054-cov-10462	NODE-39103-length-1054-cov-10462
NODE-39400-length-1045-cov-11100	unassigned	unassigned	Begeman and cols. (2023)	unassigned	NODE-39400-length-1045-cov-11100	NODE-39400-length-1045-cov-11100
NODE-4084-length-3150-cov-330	unassigned	unassigned	Begeman and cols. (2023)	unassigned	NODE-4084-length-3150-cov-330	NODE-4084-length-3150-cov-330
NODE-4316-length-2846-cov-497	unassigned	unassigned	Begeman and cols. (2023)	unassigned	NODE-4316-length-2846-cov-497	NODE-4316-length-2846-cov-497
NODE-4352-length-2622-cov-13	unassigned	unassigned	Begeman and cols. (2023)	unassigned	NODE-4352-length-2622-cov-13	NODE-4352-length-2622-cov-13
NODE-4667-length-2829-cov-392	unassigned	unassigned	Begeman and cols. (2023)	unassigned	NODE-4667-length-2829-cov-392	NODE-4667-length-2829-cov-392
NODE-4778-length-2103-cov-893	unassigned	unassigned	Begeman and cols. (2023)	unassigned	NODE-4778-length-2103-cov-893	NODE-4778-length-2103-cov-893
NODE-5522-length-1853-cov-1103	unassigned	unassigned	Begeman and cols. (2023)	unassigned	NODE-5522-length-1853-cov-1103	NODE-5522-length-1853-cov-1103
NODE-5704-length-1799-cov-1080	unassigned	unassigned	Begeman and cols. (2023)	unassigned	NODE-5704-length-1799-cov-1080	NODE-5704-length-1799-cov-1080
NODE-6577-length-1985-cov-33	unassigned	unassigned	Begeman and cols. (2023)	unassigned	NODE-6577-length-1985-cov-33	NODE-6577-length-1985-cov-33
NODE-6686-length-2471-cov-464	unassigned	unassigned	Begeman and cols. (2023)	unassigned	NODE-6686-length-2471-cov-464	NODE-6686-length-2471-cov-464
NODE-67420-length-1124-cov-3	unassigned	unassigned	Begeman and cols. (2023)	unassigned	NODE-67420-length-1124-cov-3	NODE-67420-length-1124-cov-3
NODE-7000-length-2630-cov-337	unassigned	unassigned	Begeman and cols. (2023)	unassigned	NODE-7000-length-2630-cov-337	NODE-7000-length-2630-cov-337
NODE-70067-length-1031-cov-5	unassigned	unassigned	Begeman and cols. (2023)	unassigned	NODE-70067-length-1031-cov-5	NODE-70067-length-1031-cov-5
NODE-7158-length-1396-cov-2	unassigned	unassigned	Begeman and cols. (2023)	unassigned	NODE-7158-length-1396-cov-2	NODE-7158-length-1396-cov-2
NODE-72779-length-1030-cov-9	unassigned	unassigned	Begeman and cols. (2023)	unassigned	NODE-72779-length-1030-cov-9	NODE-72779-length-1030-cov-9
NODE-73028-length-1026-cov-5	unassigned	unassigned	Begeman and cols. (2023)	unassigned	NODE-73028-length-1026-cov-5	NODE-73028-length-1026-cov-5
NODE-7323-length-2362-cov-94	unassigned	unassigned	Begeman and cols. (2023)	unassigned	NODE-7323-length-2362-cov-94	NODE-7323-length-2362-cov-94
NODE-75058-length-1047-cov-7	unassigned	unassigned	Begeman and cols. (2023)	unassigned	NODE-75058-length-1047-cov-7	NODE-75058-length-1047-cov-7
NODE-7525-length-1777-cov-3	unassigned	unassigned	Begeman and cols. (2023)	unassigned	NODE-7525-length-1777-cov-3	NODE-7525-length-1777-cov-3
NODE-8277-length-1738-cov-3292	unassigned	unassigned	Begeman and cols. (2023)	unassigned	NODE-8277-length-1738-cov-3292	NODE-8277-length-1738-cov-3292
NODE-8278-length-1738-cov-3232	unassigned	unassigned	Begeman and cols. (2023)	unassigned	NODE-8278-length-1738-cov-3232	NODE-8278-length-1738-cov-3232
NODE-9207-length-1133-cov-729	unassigned	unassigned	Begeman and cols. (2023)	unassigned	NODE-9207-length-1133-cov-729	NODE-9207-length-1133-cov-729
